# Daily rhythms in the transcriptomes of the human parasite *Schistosoma mansoni*

Kate A. Rawlinson<sup>1\*</sup>, Adam J. Reid<sup>1</sup>, Zhigang Lu<sup>1</sup>, Patrick Driguez<sup>1,2</sup>, Anna Wawer<sup>3</sup>, Avril Coghlan<sup>1</sup>, Geetha Sankaranarayanan<sup>1</sup>, Sarah Kay Buddenborg<sup>1</sup>, Carmen Diaz Soria<sup>1</sup>, Catherine McCarthy<sup>1</sup>, Nancy Holroyd<sup>1</sup>, Mandy Sanders<sup>1</sup>, Karl Hoffmann<sup>3</sup>, David Wilcockson<sup>3</sup>, Gabriel Rinaldi<sup>1</sup>, Matt Berriman<sup>1\*</sup>

<sup>1</sup>Wellcome Sanger Institute, Wellcome Genome Campus, Hinxton, CB10 1SA, UK.

<sup>2</sup>King Abdullah University of Science and Technology, Thuwal, Makkah, Saudi Arabia

<sup>3</sup>Institute of Biological, Environmental, and Rural Sciences, Aberystwyth University, Aberystwyth SY23 3DA, UK

\* Corresponding authors: [kr16@sanger.ac.uk](mailto:kr16@sanger.ac.uk) and [mb4@sanger.ac.uk](mailto:mb4@sanger.ac.uk)

## Abstract

The consequences of the earth's daily rotation have led to 24-hour biological rhythms in most organisms. Parasites have daily rhythms, which, when in synchrony with host rhythms, optimize their fitness. Using round-the-clock transcriptomics of male and female *Schistosoma mansoni* blood flukes we have discovered the first 24-hour molecular oscillations in a metazoan parasite, and gained insight into its daily rhythms. We show that expression of ~2% of its genes followed diel cycles. Rhythmic processes, in synchrony in both sexes, included a night-time stress response and a day-time metabolic 'rush hour'. These 24hr rhythms may be driven by host rhythms and/or generated by an intrinsic circadian clock. However, canonical core clock genes are lacking, suggesting an unusual oscillatory mechanism or loss of a functional clock. The daily rhythms in biology identified here, may promote within-host survival and between-host transmission, and are important for the development and delivery of therapeutics against schistosomiasis.

**Key words:** daily rhythms, transcriptomics, RNA-seq, adult *Schistosoma mansoni*, animal circadian clock genes

## Introduction

Most organisms have biological rhythms that coordinate activities with the consequences of the earth's daily rotation (Reese *et al.*, 2017). These biological rhythms are driven by daily cycles in environmental factors such as temperature, light, predation risk and resource availability, as well as an endogenous molecular circadian clock (Rund *et al.*, 2016). Whereas some daily phenotypes are driven by natural environmental cycles, circadian rhythms persist in constant conditions, sustained by an endogenous oscillatory mechanism, the circadian clock. The circadian clock is a molecular network that in animals is largely conserved across diverse lineages (Hardin, 2011; Takahashi, 2017). Interconnected regulatory loops are organized around a core transcriptional-translational feedback loop consisting of the positive factors including *CLOCK*, *ARNTL* (*BMAL1/CYCLE*) and the negative regulators *TIMELESS*, *CRYPTOCHROME* and *PERIOD*, and secondary clock genes that modulate the effects of the core feedback loop; together these drive oscillations in many clock-controlled genes. Circadian and clock-controlled genes are a subset of the genes that show daily

47 patterns of expression (diel genes), and all together they lead to 24-hour patterns in physiology and  
48 behaviour.

49

50 Much like their free-living counterparts, parasites living within the bodies of other organisms also  
51 have biological rhythms. These rhythms maximise parasite fitness in terms of within-host survival  
52 and between-host transmission (O'Donnell *et al.*, 2011). Understanding the rhythms of parasites  
53 will provide insight into how they temporally compartmentalise their internal processes and host  
54 interactions to survive the daily cycles of host immune system activity and physiology.

55 Furthermore, understanding both parasite and host rhythms may enable development of vaccines  
56 and drugs that take advantage of rhythmic vulnerabilities in parasites or harness host rhythms to  
57 improve efficacy and reduce drug toxicity (Westwood *et al.*, 2019). Recent work on blood-dwelling  
58 protozoan parasites has revealed daily rhythms in gene expression, physiology, drug sensitivity  
59 (Rijo-Ferreira *et al.*, 2017) and the presence of an intrinsic clock (Rijo-Ferreira *et al.*, 2020).

60 However, similar studies on metazoan parasites are lacking. Exploring daily molecular oscillations  
61 in metazoan parasites will give us insight into how these longer-lived organisms can survive host  
62 daily cycles over a life-span of many years, and will lead to an understanding of how animal  
63 circadian clockwork has evolved in parasites.

64

65 One long-lived metazoan parasite is *Schistosoma mansoni*, a blood-dwelling flatworm  
66 (Platyhelminthes), that can live in the vascular system for over 30 years (Harris *et al.*, 1984). It  
67 causes Schistosomiasis, a major neglected tropical disease, that has a profound human impact, with  
68 an estimated 140,000 cases and 11,500 deaths in 2019 (GBD 2019). Nothing is known about  
69 whether the adult worms (which give rise to the pathology-causing eggs) exhibit any daily or  
70 circadian rhythms in any aspect of their biology because they live deep inside the portal veins.  
71 Earlier in development *S. mansoni* cercariae larvae are shed from the snail host at a population-  
72 specific time of day (Mouahid *et al.*, 2012), but the molecular underpinnings of this rhythm are not  
73 known. *S. mansoni* naturally infects both humans and mice in the wild (Catalano *et al.*, 2018), and  
74 mice are commonly used as definitive hosts in the laboratory maintenance of its life cycle. The  
75 mouse is also the model species routinely used to study circadian rhythms in mammals (Zhang *et*  
76 *al.*, 2014), and because of this, we know there are many daily rhythmic fluctuations in the  
77 vasculature (e.g. temperature, pressure, oxygen, glucose, red and white blood cells [Damiola *et al.*,  
78 2004, Curtis *et al.*, 2007, Scheiermann *et al.*, 2012, Adamovich *et al.*, 2017, Llanos & de Vacarro,  
79 1972]) that may act as zeitgebers (German for “time giver” or synchronizer) to influence the  
80 worm’s biology and potentially its rhythms. Here we ask whether sexually mature male and female  
81 *S. mansoni*, collected from their natural environment (the mesenteric vasculature of mice) under

82 ‘normal’ host conditions (Light:Dark cycle) show daily rhythms in their transcriptomes. Transcripts  
83 that cycle with 24 hour periodicity (diel or cycling genes), were identified using RNA-seq time  
84 series from female and male worms as well as the heads of males (to enrich for the worm’s cephalic  
85 ganglia or ‘brain’; the site of the master circadian clock in some animals). Protein function  
86 databases and published single cell RNA-seq data (Wendt *et al.*, 2020) were interrogated using our  
87 diel genes to identify rhythmic biological processes. One-to-one orthologs were compared between  
88 *S. mansoni* diel genes and those of other animals to investigate metazoan circadian clock  
89 components. Having found that most cell types associated with the female reproductive system are  
90 enriched for cycling genes, we show that egg laying *in vitro* oscillates between day and night. Our  
91 discovery that genes oscillate throughout the 24-hour period has given us an understanding of the  
92 fine-scale temporal partitioning of biological processes in male and female worms, and indications  
93 of parasite/host interactive rhythms. As these diel genes include potential drug targets and a vaccine  
94 candidate, this study will benefit the development and delivery of treatments against  
95 schistosomiasis.

96

## 97 **Results**

98 We collected mature male and female worms at four hour intervals over a 44 hour period from mice  
99 entrained in alternating 12-hour light and dark cycles (LD12:12). Although light is probably not a  
100 relevant zeitgeber to schistosome adults (as penetrative light levels below 5mm in mammalian  
101 bodies are minimal, Ash *et al.*, 2017), light is an important cue for the mouse, and as nocturnal  
102 creatures, they are active mainly during the dark phase (Jud *et al.* 2005). Zeitgeber time (ZT) 0  
103 indicates the beginning of the light phase and resting phase for the mouse (which we call day-time  
104 here), and ZT 12 is the beginning of dark phase and active phase for the mouse (called night-time in  
105 this study). Male and female worms from each mouse were separated and pooled. Heads of male  
106 worms were also isolated and these were pooled for each mouse. RNA was extracted from each  
107 pool and sequenced. This gave us three time-series datasets; one for whole female worms, one for  
108 whole males and one for male heads (**Figure 1A**).

109

### 110 **1. Daily rhythms in the transcriptomes of adult *Schistosoma mansoni***

111 From each dataset, we identified genes that were differentially expressed (FDR < 0.05) over a 24  
112 hour period: 206 in females, 194 in males and 48 in male heads (**Supplementary Table 1-3**). We  
113 then determined which differentially expressed genes were oscillating with a periodicity close to 24  
114 hours using JTK\_cycle (Hughes *et al.*, 2010), and found 98 diel genes in females, 141 in males and  
115 18 in male heads (**Figure 1B&C; Supplementary table 1-4**). A significant number were shared

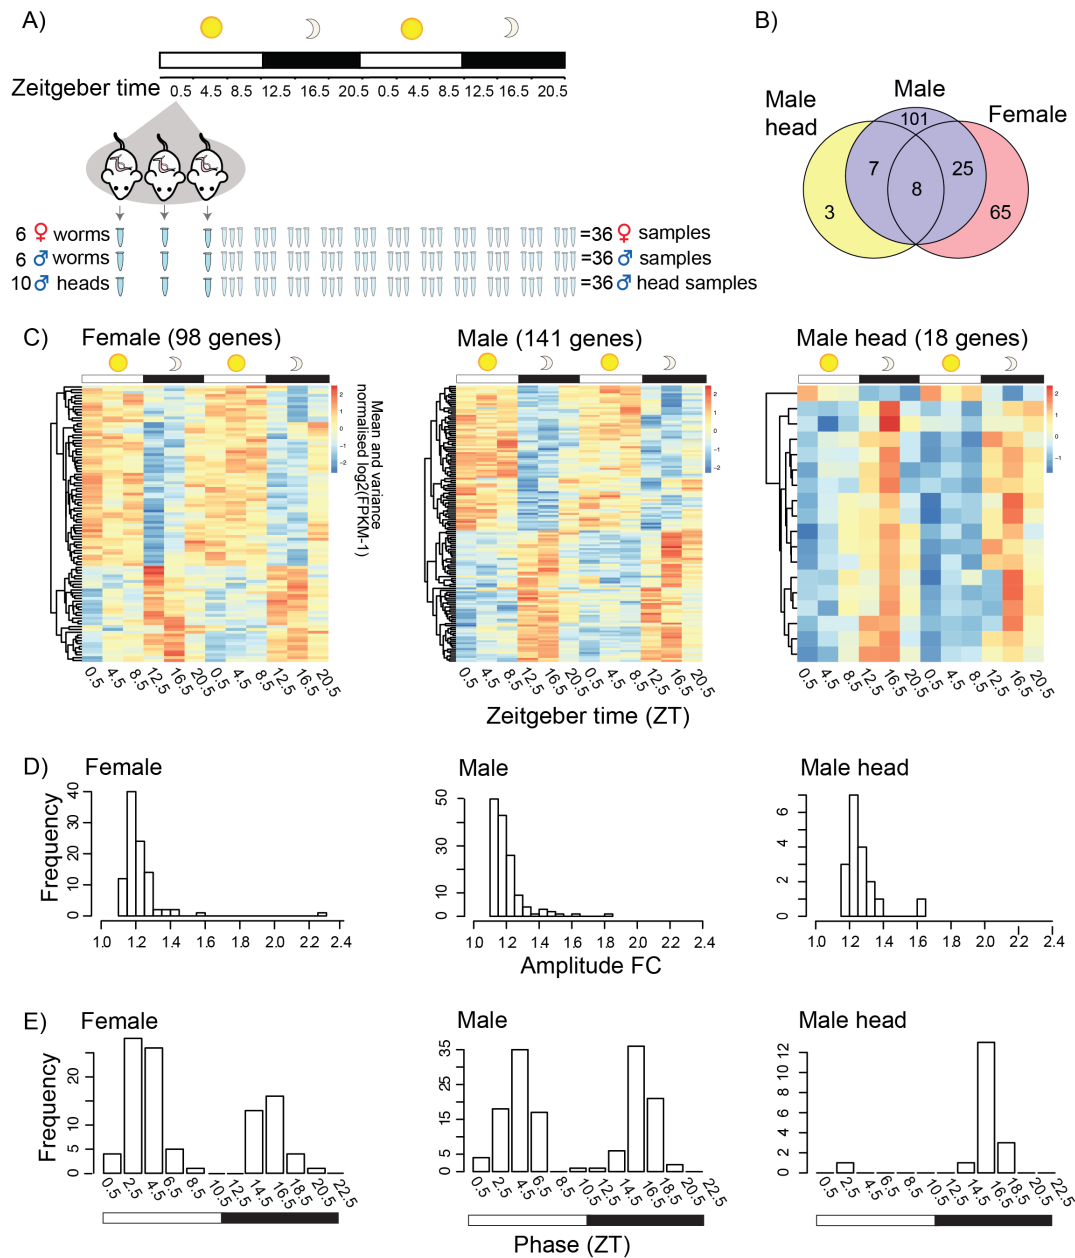

116

117 **Figure 1.** *Schistosoma mansoni* genes with 24-hour periodicity in their expression in adult worms.  
 118 **A)** Schematic of the collection of pooled worm samples every 4 hours over 44 hours. **B)** Overlap in  
 119 209 diel genes between females, males and male heads. **C)** Expression heatmaps of diel genes. Each  
 120 row represents a gene whose transcripts oscillate with ~24 hour periodicity, ordered vertically by  
 121 phase. **D)** Histograms of rhythmic daily fold changes (FC) in transcript abundance. **E)** Histograms  
 122 showing bimodal peaks of expression in diel genes in both sexes, but in male heads most diel genes  
 123 peak at midnight.

124

125 between males and females (33; Fisher's exact test odds ratio = 47,  $P < 10^{-16}$ ) and between males  
 126 and male heads (15; Fisher's exact test odds ratio = 395,  $P < 10^{-16}$ ; **Figure 1B, Supplementary**  
 127 **table 4**). The combined number of diel genes from the three datasets was 209 (**Figure 1B;**  
 128 **Supplementary table 4**), 1.9% of the *S. mansoni* (v7) gene set. The median peak-to-trough fold  
 129 change (amplitude) of gene expression for diel genes was 1.19, 1.18 and 1.24 for females, males  
 130 and male heads respectively. However, many genes had much higher daily fold-changes in

131 expression (**Figure 1D; Table 1**); the highest in each of the datasets were *SmKI-1* (Smp\_307450,  
 132 fold change 1.8) in males that encodes a BPTI/Kunitz protease inhibitor domain protein, as well as  
 133 *hsp70* (Smp\_049550, 1.6 fold) in male heads and *hsp90* (Smp\_072330, 2.3 fold) in females that  
 134 each encode heat shock proteins (in males *Hsp90* has a 4.8 fold change but falls just outside FDR  
 135  $<0.01$  threshold [FDR = 0.0103])(**Table 1**)(see **Supplementary table 5** for orthologs in other taxa).  
 136 While we identified rhythmic genes with peaks of expression at most times of day, there was a clear  
 137 bimodal pattern in both females and males (**Figure 1E**). In females, expression peaked at 2.5-4.5hr  
 138 (ZT) after lights on and at 14.5-16.5 hr (ZT) (2.5-4.5hr after lights off), but with 66% of the cycling  
 139 genes peaking during the day (the hosts resting phase), while in males the peaks occurred at 4.5 and  
 140 16.5 (ZT) (with a 53:47% split between light:dark phases). In the heads of males, the expression of  
 141 diel genes peaked at ZT 16.5, and was not bimodal, with all but one reaching peak expression  
 142 during the night (the hosts active phase).

143

144 **Table 1.** Diel genes with the highest expression amplitudes. Daily fold-changes in transcript  
 145 abundance are shown for female and male worms, plus male heads, with peak phase of expression  
 146 (Zeitgeber Time, ZT, grey shading= night, white = day) and significance of 24-hr rhythmicity  
 147 determined using JTK package. (\* I-Tasser predicted structural analogue, see supplementary table  
 148 6).

| Dataset    | Gene ID                                                    | Gene description                                          | Fold change | Phase (ZT) | JTK Benjamini-Hochberg q-value |
|------------|------------------------------------------------------------|-----------------------------------------------------------|-------------|------------|--------------------------------|
| Female     | Smp_072330                                                 | Heat shock protein 90                                     | 2.30        | 14.5       | 0.00032                        |
|            | Smp_326610                                                 | Trematode eggshell synthesis domain-containing protein    | 1.56        | 6.5        | 0.00191                        |
|            | Smp_004780                                                 | FKBP-type peptidylprolyl isomerase (PPIase)               | 1.41        | 16.5       | 0.00019                        |
|            | Smp_044850                                                 | Ribokinase                                                | 1.41        | 16.5       | 0.00770                        |
|            | Smp_342000                                                 | FMRFamide-activated amiloride-sensitive sodium channel    | 1.38        | 8.5        | 0.00191                        |
|            | Smp_069130                                                 | Heat shock protein 70 (Hsp70)-4                           | 1.35        | 14.5       | 0.00029                        |
|            | Smp_319380                                                 | n/a                                                       | 1.33        | 2.5        | 0.00362                        |
|            | Smp_244190                                                 | ZP domain-containing protein                              | 1.31        | 14.5       | 0.00588                        |
|            | Smp_340010                                                 | Putative eggshell protein                                 | 1.30        | 4.5        | 0.00235                        |
| Smp_064860 | Putative heat shock protein 70 (Hsp70)-interacting protein | 1.30                                                      | 16.5        | 7.92E-05   |                                |
| Male       | Smp_307450                                                 | SmKI-1, a BPTI/Kunitz protease inhibitor domain protein   | 1.83        | 4.5        | 0.00311                        |
|            | Smp_049550                                                 | Putative heat shock protein 70 (Hsp70)                    | 1.62        | 16.5       | 1.21E-06                       |
|            | Smp_324960                                                 | Hypothetical protein (Fatty acid synthase-like*)          | 1.57        | 18.5       | 0.00112                        |
|            | Smp_327270                                                 | Very-long-chain 3-oxoacyl-CoA reductase                   | 1.52        | 18.5       | 0.00763                        |
|            | Smp_327260                                                 | Transmembrane protein 45B                                 | 1.49        | 18.5       | 0.00468                        |
|            | Smp_013950                                                 | Solute carrier family 43 member 3                         | 1.48        | 0.5        | 0.00112                        |
|            | Smp_328570                                                 | n/a                                                       | 1.48        | 4.5        | 0.00763                        |
|            | Smp_327240                                                 | Hypothetical protein (GTPase activator activity*)         | 1.45        | 18.5       | 0.00651                        |
|            | Smp_004780                                                 | FKBP-type Peptidylprolyl isomerase (PPIase)               | 1.36        | 16.5       | 7.31E-05                       |
| Smp_013790 | Probable ATP-dependent RNA helicase, DDX5                  | 1.35                                                      | 0.5         | 0.00047    |                                |
| Male head  | Smp_049550                                                 | Putative heat shock protein 70 (Hsp70)                    | 1.63        | 16.5       | 1.43E-05                       |
|            | Smp_004780                                                 | FKBP-type peptidylprolyl isomerase (PPIase)               | 1.35        | 16.5       | 0.00055                        |
|            | Smp_145560                                                 | Monocarboxylate transporter 9                             | 1.33        | 2.5        | 0.00236                        |
|            | Smp_124820                                                 | Putative chromosome region maintenance protein 1/exportin | 1.30        | 18.5       | 0.00236                        |
|            | Smp_069130                                                 | Heat shock protein 70 (Hsp70)-4                           | 1.30        | 16.5       | 0.00236                        |
|            | Smp_333170                                                 | 85/88 kDa calcium-independent phospholipase A2            | 1.28        | 18.5       | 0.00188                        |
|            | Smp_113620                                                 | Serine/arginine-rich splicing factor 2                    | 1.27        | 16.5       | 0.00297                        |
|            | Smp_049600                                                 | Putative DNAj (Hsp40) homolog, subfamily C, member 3      | 1.25        | 16.5       | 7.31E-05                       |
|            | Smp_214080                                                 | VEZF1/Protein suppressor of hairy wing/Zld/ C2H2-type     | 1.25        | 16.5       | 7.49E-06                       |
| Smp_246230 | Nicotinate-nucleotide pyrophosphorylase                    | 1.24                                                      | 16.5        | 0.00035    |                                |

149

## 150 **2. Putative functions of diel genes**

151 To better understand the possible function of the diel genes, we used a combination of annotation-  
152 enrichment analyses based on Gene Ontology (GO), KEGG pathways, STRING molecular  
153 interactions and the adult *S. mansoni* single-cell RNA-seq dataset from Wendt *et al.* (2020)  
154 (**Supplementary tables 7,8,9, figure 2, supplementary figures 1 & ?**). Our analyses show that the  
155 diel genes are involved in distinct rhythmic processes during the night and day time.

156

### 157 *Night-time peaking genes*

158 Of the 63 genes with a night-time peak in males, 33 formed a single large network based on their  
159 predicted STRING interactions (**Figure 2**). Within this network many of the molecules with the  
160 largest number of interactions were putative molecular chaperones (orthologs to heat shock proteins  
161 [HSPs] and their co-chaperones) involved in protein processing the ER and the stress response. In  
162 females a smaller network of 13 genes was predicted, but heat shock /stress response genes were  
163 still the main constituents **Supplementary figure 1**). These observations were supported by  
164 enrichment of GO terms related to protein folding and chaperones: protein folding/unfolded protein  
165 binding (males FDR 0.0013, females FDR  $10^{-9}$ ; **Supplementary table 7**). Diel genes involved in  
166 these processes and networks all had acrophases between 14.5-18.5 ZT (i.e. mid dark  
167 phase)(**Supplementary figure 2**), and could be mapped to three KEGG pathways; ‘protein  
168 processing in the endoplasmic reticulum’, ‘PI3K-AKT signalling’ and ‘Estrogen  
169 signalling’(**Supplementary figures 3-5**). Orthologs of six of the diel HSPs in *S. mansoni* show 24-  
170 hour rhythms in other animals as well (**Supplementary tables 4, 5 and 13**).

171

172 Ten HSPs and co-chaperones cycled in both sexes, with eight oscillating in phase synchrony  
173 between the sexes (**Supplementary figure 2**). A striking example of this is seen in *hsp90*  
174 (*Smp\_072330*) and *FKBP-type peptidylprolyl isomerase (PPIase)*(*Smp\_004780*); *hsp90* peaks at  
175 the start of the dark phase, 4 hours before *PPIase* (**Figure 3 & 4**). In other animals, these proteins  
176 form part of a heterocomplex that chaperones steroid hormones in cell signalling (**Supplementary**  
177 **figures 5**) and they are critical for reproductive success (Cheung-Flynn *et al.*, 2005). Although their  
178 functions aren’t known in *S.mansoni*, both are single cell markers for germ stem cell progeny and  
179 we show, using whole mount *in situ* hybridisation (WISH), that *PPIase* is expressed in sperm  
180 throughout the testes and in all oocytes in the ovary (**Figure 3C & 4C**). *PPIase* also cycles in male  
181 head samples and is expressed in many cells in the head (**Figure 3C**). There were also sex  
182 differences in the diel genes involved in the nightly chaperone response. For example, a *DNAj*  
183 (*hsp40*), which has homologs located on the different sex chromosomes (known as

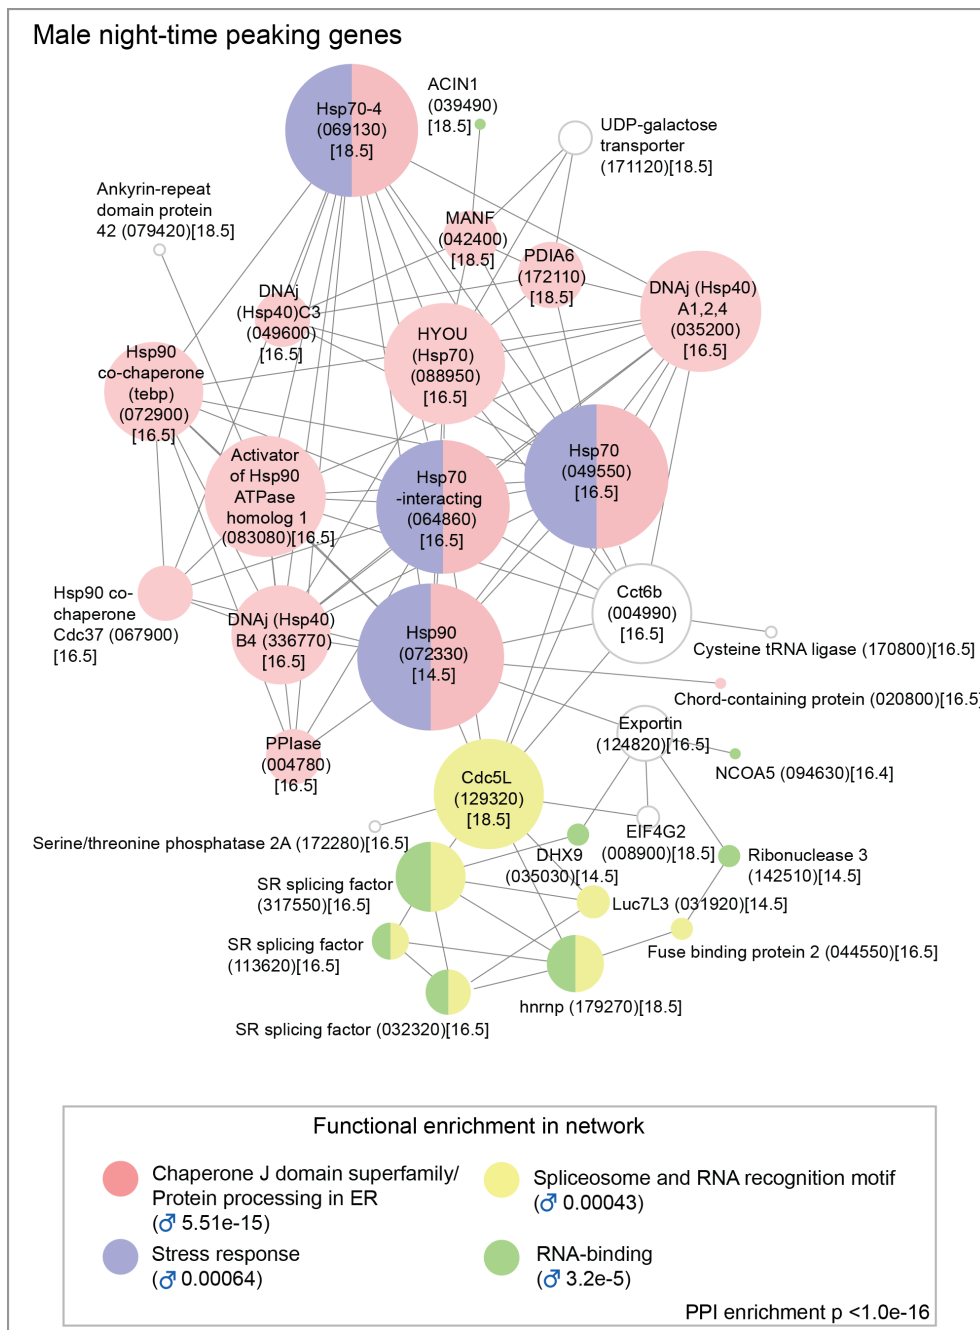

184

185 **Figure 2.** Predicted molecular interaction networks of night-time peaking genes in male  
 186 *Schistosoma mansoni* (computed using the STRING online database). All genes peaked between  
 187 14.5-18.5 ZT (i.e. between 2.5- 6.5 hours after the start of the dark phase). Node size reflects the  
 188 number of connections a molecule has within the network. Lines (edges) connecting nodes are  
 189 based on evidence of the function of homologues. Functional enrichment (FDR) as provided by  
 190 STRING. (PPI= predicted protein interaction; gene identifiers shown in parenthesis but with  
 191 “Smp\_” prefix removed for clarity; timing of acrophase (ZT) in square brackets).  
 192

193 gametologues)(Buddenborg *et al.*, *in prep*), has diel expression in both gametologues. Schistosomes  
 194 have a ZW sex chromosome system, where females are ZW and males are ZZ. The Z gametologue  
 195 (Smp\_336770) cycles in females, males and male heads, and the W gametologue (Smp\_020920)  
 196 also cycles, and is present only in females. Further sex differences included diel expression, in  
 197 males only, of nine genes whose orthologs are involved in stress response and recovery

198 **(Supplementary figure 2iii)**. Four of these genes are markers for tegument-related cell types  
 199 **(Figures 3)** and as the male tegument forms a large surface area that is in direct contact with mouse  
 200 blood and endothelium, these cells are likely to be exposed to environmental heat shock triggers.

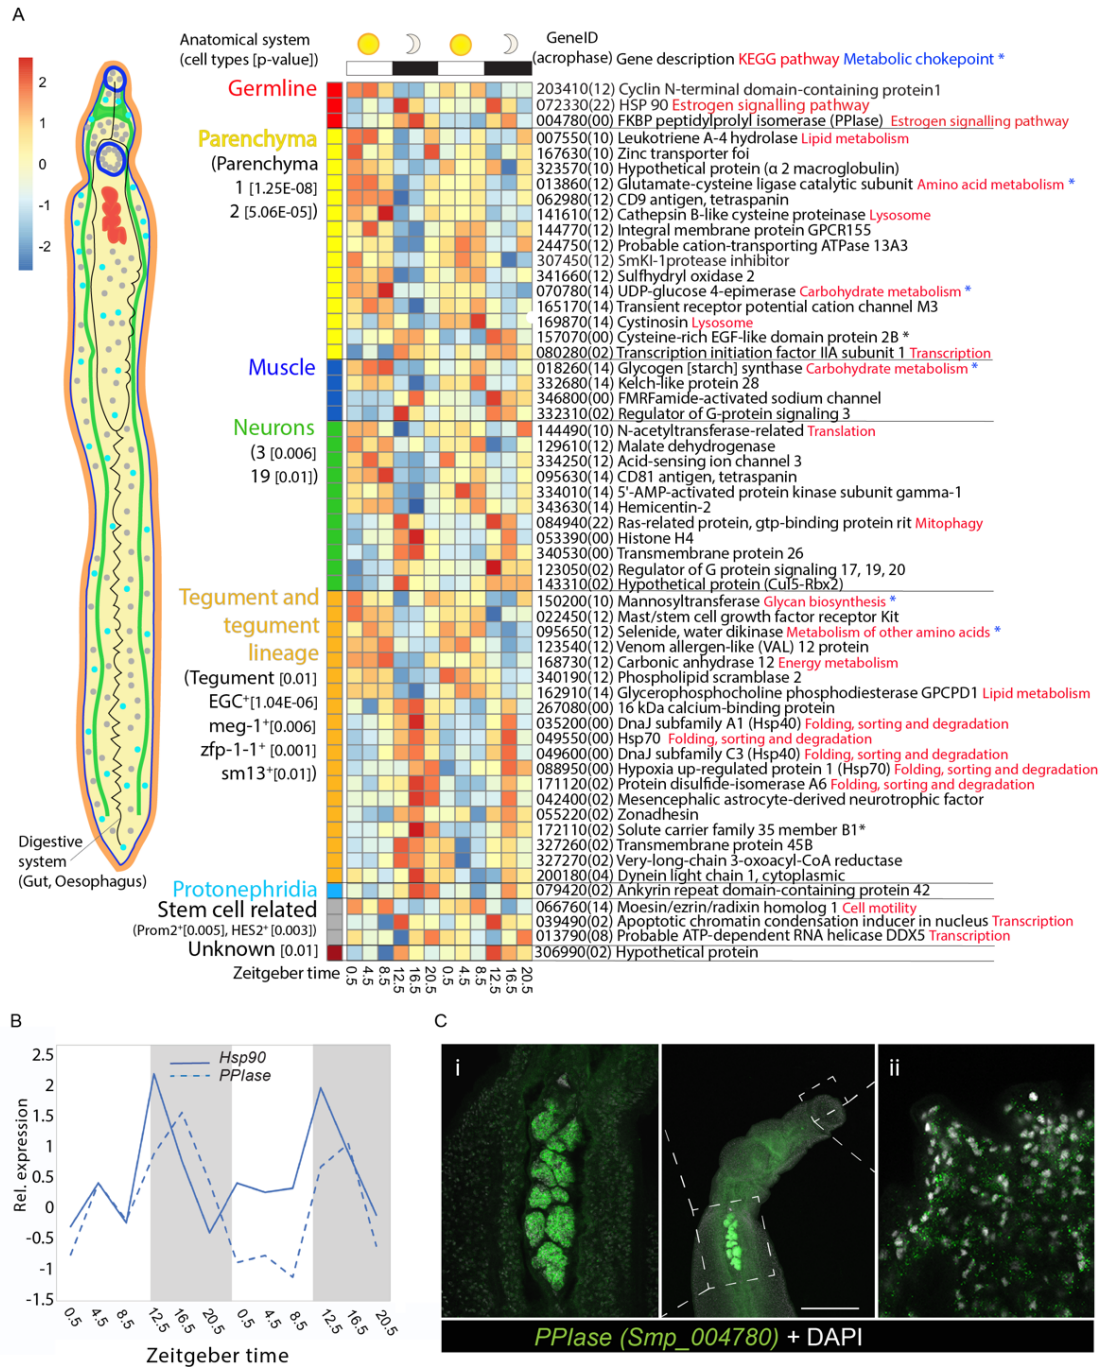

201  
 202 **Figure 3. A)** Heatmap of the 57 male diel genes that are single cell markers (identified in Wendt *et*  
 203 *al.*, 2020). Each row represents a diel gene, ordered vertically by phase within anatomical systems  
 204 containing constituent cell types. Diel genes that are markers for multiple cell type categories are  
 205 placed within cell type (and their category) with greatest difference between the Seurat pct1-pct2  
 206 scores. “Smp\_” prefixes have been removed from gene identifiers for clarity; timing of acrophase in  
 207 parentheses. P-value of cell types significantly enriched in diel genes given in brackets [p<0.05].  
 208 **B)** Temporal relative expression profiles of *Hsp90* (*Smp\_072330*) and *FKBP-type peptidylprolyl*  
 209 *isomerase (PPIase)* (*Smp\_004780*) showing peaks of expression at night. **C)** WISH expression of  
 210 *PPIase* showing labelled transcripts in male worm i) throughout the testes, and ii) in the head (scale  
 211 bar = 100µm)(100% of individuals examined, n = 10).



212 Night-time peaking genes were also associated with GO terms related to RNA binding and mRNA  
213 splicing, but in males only (FDR = 0.0002 for RNA binding, FDR=0.0292 for mRNA splicing;  
214 **Supplementary table 7**). Based on STRING, many of these genes form part of the night-time  
215 network (**Figure 2**), including putative homologues of: *human Ser/Arg-rich splicing factors*  
216 (Smp\_317550, Smp\_032320, Smp\_113620); *heterogeneous nuclear ribonucleoprotein* (Hnrp;  
217 Smp\_179270); the *cell division cycle control protein Cdc5L* (Smp\_129320), a spliceosome  
218 component; and the splicing regulator (Li *et al.*, 2013) *far upstream element-binding protein*  
219 (Smp\_044550). The night-time network predicts an interaction between heat shock proteins and  
220 RNA-binding and mRNA splicing genes, connected via *Cdc5L* (**Figure 2**).

221

222 Diel genes involved in regulation of GPCR functioning (*regulator of G-protein signalling 3 [RGS3]*  
223 Smp\_332310; and *RGS20* Smp\_123050) peaked at night and are markers for muscle and nerve  
224 cells respectively (**Figures 3 and 4**). *Histone 4* (Smp\_053390) and *gtp-binding Ras-related protein*  
225 (Smp\_084940)(a member of the histone co-chaperone pathway) also peaked at night in males and  
226 are markers for nerve cell types (**Figure 3**). Neuronal activity promotes histone turnover (Maze *et*  
227 *al.*, 2015; Grover *et al.*, 2018) and taken together these results may indicate higher sensory  
228 responsiveness and activity night.

229

### 230 **Day-time peaking genes**

231 Predicted interactions between the day-time peaking genes were more limited than at night; both  
232 sexes had interactions of genes associated with metabolism (**Supplementary figures 6**). There were  
233 32 diel genes that could be mapped to KEGG metabolic pathways; most of which are involved in  
234 lipid, carbohydrate and amino acid metabolism (**Supplementary table 9**). Of these, 28 have  
235 acrophases between 0.5–6.5 ZT, suggesting a peak in metabolic activity at this time; an extended  
236 metabolic ‘rush hour’ (**Figure 5A**). We identified twenty-one diel genes that have previously been  
237 classified as metabolic chokepoints (capable of uniquely generating specific products or utilising  
238 specific substrates, International Helminths Genome Consortium, 2019) for potentially targeting  
239 with new drugs, 15 of these peaked during the day (**Figure 5B**) and six at night (**Supplementary**  
240 **table 4**). Several metabolic diel genes were also markers of specific cell types: those of the  
241 reproductive system in female worms, and those of tegumental, parenchymal and muscle cells in  
242 males (**Figures 3 & 4**).

243

244 There are four diel genes involved in the insulin signalling pathway and they all peaked between  
245 2.5-6.5 ZT; *glycogen synthase* (Smp\_018260) and *3-phosphoinositide-dependent protein kinase 1*  
246 (Smp\_094250) in males, and *hexokinase* (Smp\_043030) and *protein phosphatase 1 regulatory*

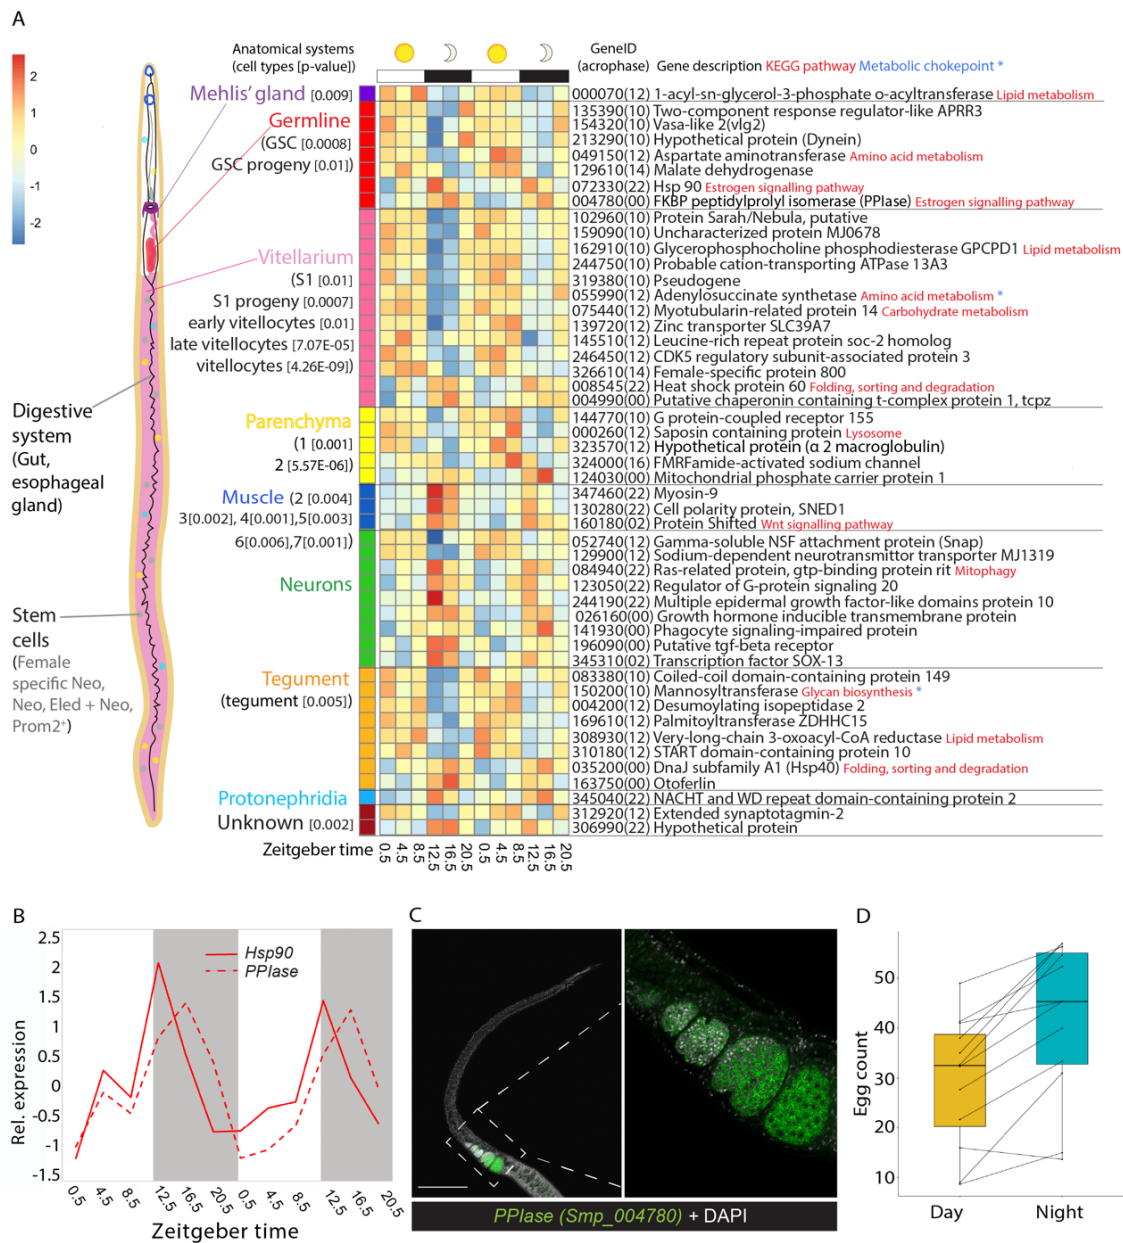

247

248 **Figure 4.** A) Heatmap of 48 single-cell marker genes that showed diel expression in females.  
 249 Marker genes are from Wendt et al., 2020. Each row represents a diel gene, ordered vertically by  
 250 phase within anatomical systems containing constituent cell types. Diel genes that are markers for  
 251 multiple cell type categories are placed within cell type (and their category) with greatest difference  
 252 between their Seurat pct1-pct2 scores. “Smp\_” prefixes have been removed from gene identifiers  
 253 for clarity; timing of acrophase in parentheses. P-value of cell types significantly enriched in diel  
 254 genes given in brackets [p<0.05]. B) Temporal relative expression profiles of *Hsp90* (Smp\_072330)  
 255 and *FKBP-type peptidylprolyl isomerase (PPIase)* (Smp\_004780) showing peaks of expression at  
 256 night. C) WISH expression of *PPIase* showing labelled transcripts in female worm in all oocytes in  
 257 the ovary (scale bar = 100µm)(100% of individuals examined, n = 10). D) Female (paired) worms  
 258 *in vitro* lay more eggs at night (median and interquartile ranges) than during the day (n=12 female  
 259 worms; median (night egg count - day egg count) = 12.0; paired Wilcoxon test: P=0.003216).  
 260

261 *subunit 3B* (Smp\_167660) in females (although the latter three fell between FDR adjusted p-values  
 262 of 0.01-0.05)(Supplementary table 9, Figure 5D).

263

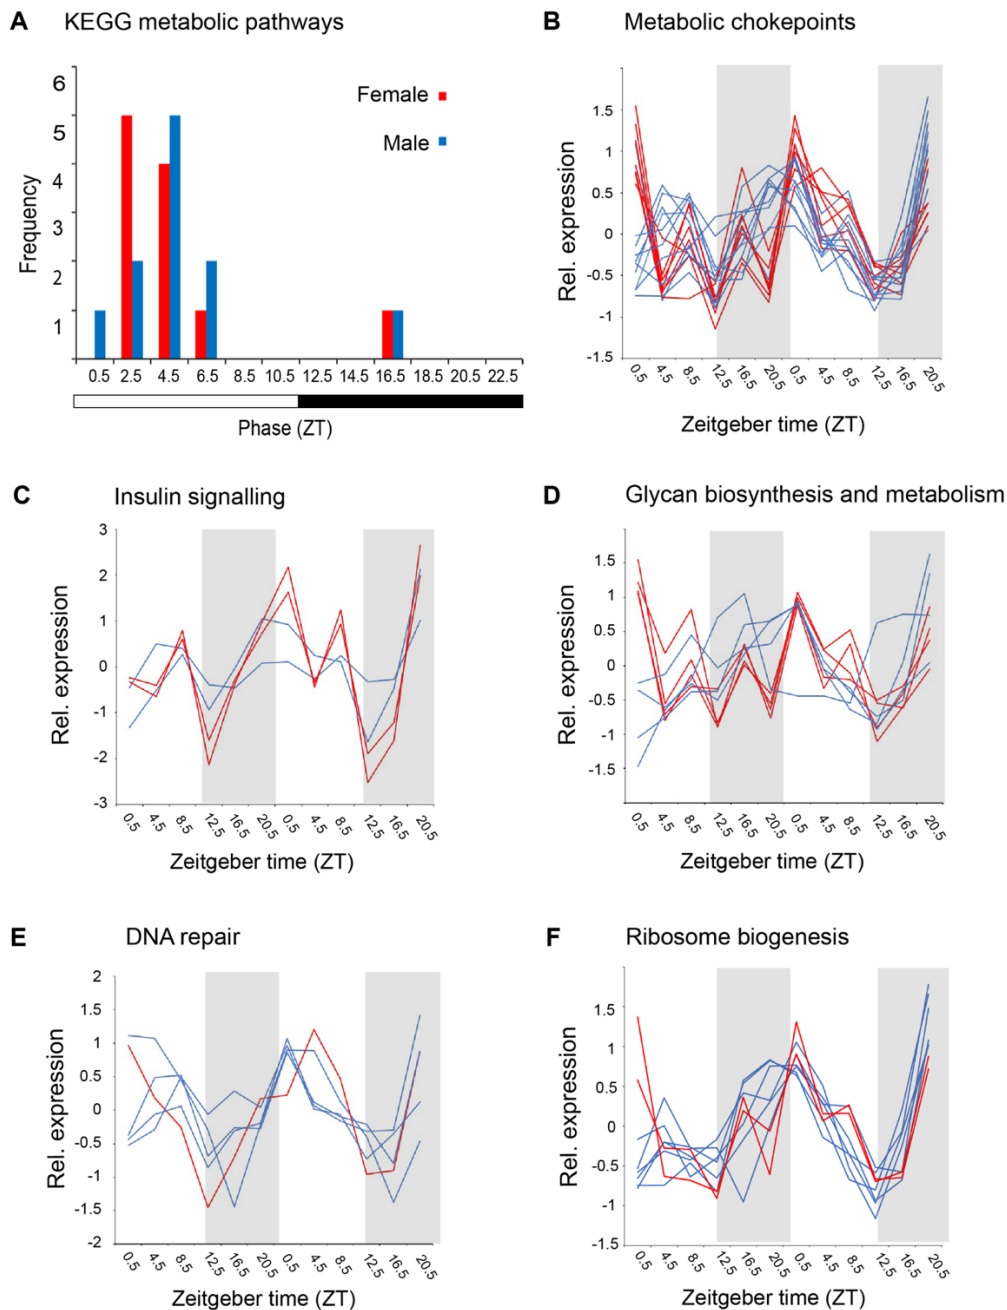

264

265 **Figure 5.** Light-phase peaking diel genes are involved in metabolism, DNA repair and ribosome  
 266 biogenesis. **A)** Peak phase of expression of diel genes in KEGG pathways for metabolism.  
 267 Temporal expression profiles of **B)** day-time peaking metabolic genes identified as chokepoints and  
 268 potential drug targets, **C)** genes involved in the insulin signalling pathway **D)** genes involved in  
 269 glycan biosynthesis and metabolism, **E)** DNA repair and **F)** ribosome biogenesis.  
 270

271 Glycans and glycoproteins that are secreted or localized to the tegument interact with the host  
 272 immune and hemostatic systems (Smit *et al.*, 2015). We found six diel genes involved in N-glycan  
 273 and glycosaminoglycan synthesis, and glycosylation (Mickum *et al.* 2014), five of which peaked  
 274 during the day (**Figure 5D**, **supplementary table 9**), including mannosyltransferase (Smp\_150200)  
 275 that is a marker for a tegumental cell type (**Figures 3 & 4**; **supplementary table 8**). Three others  
 276 encode enzymes involved in synthesis of heparin-like glycosaminoglycans that may increase anti-  
 277 coagulation activity of mammalian host blood (Mebius *et al.*, 2013); putative beta-1,3-

278 glucuronyltransferase (heparin-like)(Smp\_083130) and Zinc finger CCHC domain-containing  
279 protein 4 (Smp\_245920) peak during the day in females, whereas putative heparan sulfate n-  
280 deacetylase/n-sulfotransferase (Smp\_134250) cycles in males, but peaks at night (**Supplementary**  
281 **table 9**).

282

283 Also peaking during the day are other genes involved in host-parasite interactions. *SmKI-1*  
284 (Smp\_307450) is one of four similar genes that correspond to Smp\_147730 from an earlier version  
285 (v5) of the genome assembly (see additional information). The SmK1-1 protein is localised to the  
286 tegument and secreted into the host where it inhibits host proteases (including neutrophil elastases)  
287 involved in triggering the immune response (Morais *et al.* 2018), and interferes with host  
288 coagulation pathways to delay blood clot formation (Ranashige *et al.*, 2015). Smp\_307450 reaches  
289 its peak at midday (ZT 4.5)(**Figure 6**) a few hours before the daily increase of mouse blood  
290 coagulation factors (Bertolucci *et al.*, 2005) and coinciding with the day-time release of mouse  
291 neutrophils into the blood from bone marrow (De Filippo & Rankin, 2018), possibly indicating that  
292 its diel expression may be anticipating or responding to these host cues. Also peaking at 4.5 ZT are  
293 *carbonic anhydrase 12* (Smp\_168730), which is a glycoprotein localised on the surface of tegument  
294 and contributes to parasite survival and virulence (Da'dara *et al.*, 2019), and *Val12* (Smp\_123540)  
295 which is a putative secreted member of the venom allergen-like family (Chalmers *et al.*, 2008).  
296 Both are single cell markers for tegumental cell types. *Val12* is a marker for late tegumental  
297 progenitor cells (Sm13<sup>+</sup> cells)(Wendt *et al.*, 2018), and we show it expressed in approximately 500  
298 cells that are positioned along the entire length of the male body (**Supplementary figure 7a**).  
299 *Val12*<sup>+</sup> cells are more abundant dorsally than ventrally, and transcripts reach the body wall  
300 musculature, with some extending in the tubercles of the dorsal tegument (**Supplementary figure 7**  
301 **b-d**). This *in situ* expression supports protein structural data indicating that it is likely to be  
302 secreted/excreted, onto the tegument or into the host environment (Chalmers *et al.*, 2008).

303

304 In males two additional day-time networks of interacting genes were predicted. The first was  
305 formed of four genes involved in DNA repair (**Supplementary figure 6**), and the GO term  
306 ‘damaged DNA binding’ was significantly enriched (FDR = 0.0036, **Supplementary table 7**;  
307 **Supplementary figure 8**). The second included genes putatively involved in ribosome biogenesis  
308 (**Supplementary figure 6**); a putative DEAD box ATP-dependent RNA helicase (orthologous to  
309 DDX5)(Smp\_013790) which cycles with high amplitude (1.4) and is a marker of HES2<sup>+</sup> stem cells  
310 (**Figure 3**), and a putative AAA family ATPase (Smp\_160870) (**Figure 2**) which also exhibits diel  
311 expression in females, and whose human ortholog (NVL) regulates 60S ribosomal subunit  
312 biogenesis in the nucleolus in a spatiotemporal manner (Nagahama *et al.*, 2004).

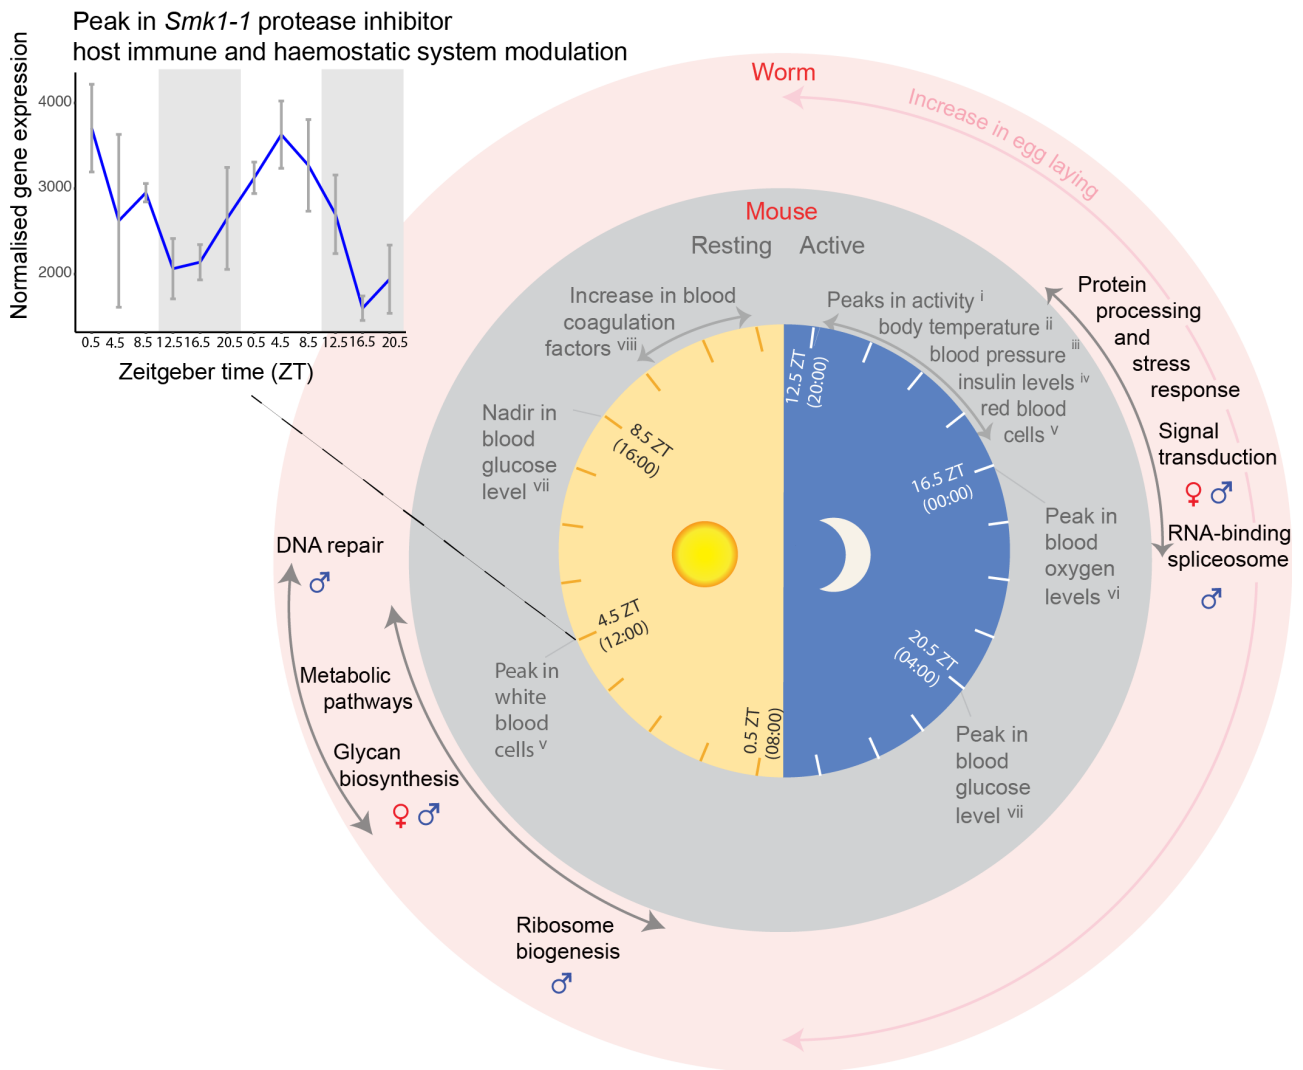

313

314 **Figure 6.** Summary schematic representing the daily rhythms in the transcriptomes of adult  
 315 *Schistosoma mansoni* (from diel gene enrichment analyses) and the mouse vasculature (<sup>i</sup>Jud *et al.*,  
 316 2005, <sup>ii</sup>Damiola *et al.*, 2004, <sup>iii</sup>Curtis *et al.*, 2007, <sup>iv</sup>Feillet *et al.*, 2016, <sup>v</sup>Scheiermann *et al.*, 2012,  
 317 <sup>vi</sup>Adamovich *et al.*, 2017, <sup>vii</sup>Llanos & de Vacarro, 1972, <sup>viii</sup>Bertolucci *et al.*, 2005). Side plot  
 318 showing temporal expression profile of *Smk1-1* (Smp\_307450) in males. Exponentiated, VST-  
 319 normalised gene expression values are shown, with means taken for each timepoint. Error bars  
 320 show the standard error of the mean.

321

322 The transcriptome patterns associated with the female reproductive system are particularly  
 323 interesting because schistosome eggs are the cause of disease (including granuloma formation after  
 324 becoming embedded in the liver and intestine) and transmission. Seventeen of the 21 diel genes that  
 325 are markers for cell types of the female reproductive system (the vitellarium, germline and Mehlis'  
 326 gland cells) peak during the day, between 2.5-6.5 ZT. These included a Trematode Eggshell  
 327 Synthesis domain-containing protein (Smp\_326610; Table 1, **Figure 4A, Supplementary Table**  
 328 **10**) that is one of several major structural component of the egg shell in schistosomes (Ebersberger  
 329 *et al.*, 2005). Also expressed in phase are other diel genes potentially involved in reproduction (but  
 330 not identified as cell type markers); a *vasa-like DEAD box ATP-dependent RNA helicase*  
 331 (Smp\_154320, expressed in mature oocytes, *Smvlg2* [Skinner *et al.*, 2012]), and a second *putative*

332 *eggshell protein* (Smp\_340010). To investigate whether transcriptional rhythms might reveal  
333 patterns in egg laying, we recorded day and night egg counts for individual worm pairs *in vitro*. For  
334 each of 12 worm pairs, we calculated a day egg count as the median of three consecutive days  
335 (three replicates), and a night egg count as the median of three consecutive nights (three replicates).  
336 Across the 12 worm pairs, the difference between the night egg count and the corresponding day  
337 egg count was significantly higher than zero, that is, paired females tended to lay more eggs at night  
338 than during the day (n=12 females; median (night egg count - day egg count) = 12.0; paired  
339 Wilcoxon test: P=0.003) (**Figure 4D**). This was also seen in three further independent biological  
340 replicates (replicate 2: n=17, paired Wilcoxon test P=0.002, median(night-day)=5.3, replicate 3:  
341 n=17, P=0.0003, median(night-day)=17.5; replicate 4: n=8, P=0.008, median(night-day)=14.3)  
342 (**Supplementary Figure 9**). Females, on average, laid 13 more eggs over the 12-hour dark phase,  
343 corresponding to a 50% increase compared with the light phase.

344

### 345 3. Could daily rhythms be generated by a circadian clock intrinsic to *Schistosoma mansoni*?

346 Of the 33 genes that cycle in both sexes, 17 show identical phases and the remaining show  
347 acrophases within 4hrs of the opposite sex (**Supplementary figure 10; supplementary Table 4**).  
348 These mRNA oscillations in phase between the sexes suggest external cyclical cues drive the  
349 synchrony of these rhythms within the *S. mansoni* pairs (and population) inside the mammalian  
350 host. Host rhythms may be driving the parasite rhythms, and doing so either directly, or entraining  
351 an endogenous time-keeping machinery within the parasite – an intrinsic circadian clock.

352

353 This led us to investigate if *S. mansoni* has homologues of the canonical animal circadian clock  
354 genes and whether they show 24-hour periodicity in our datasets. Extensive BLASTP searches  
355 revealed that core elements of the negative feedback loop appear to be missing. Even when the  
356 stringency was relaxed to an E-value of 1 (BLAST), there were no putative hits for Period or any  
357 Cryptochromes (**Supplementary table 11**). We found two DNA photolyases (**Supplementary**  
358 **table 12**), which are members of the cryptochrome/photolyase family (CPF), but they clustered  
359 with the CPD photolyases, not the canonical animal circadian-related Cryptochromes  
360 (**Supplementary figure 11**) and they lacked the FAD binding domain (see **supplementary**  
361 **information** for secondary structural features of putative circadian proteins). We identified three  
362 bHLH-PAS proteins similar to Clock (Smp\_178780 and Smp\_168600) and Cycle/Bmal1  
363 (Smp\_341950)(**Supplementary table 11 & 12**), however phylogenetic analysis showed that they  
364 clustered with the closely-related non-circadian proteins ARNT, AHR and SIM (**Supplementary**  
365 **figure 11**). Therefore, *S. mansoni* appears to lack the core negative feedback genes, Period and  
366 Cryptochromes, as well as the positive transcription factors Clock and Bmal1/Cycle. However, we

367 did identify an orthologue for Timeout (Tim2)(Smp\_163340), but not its paralogue Timeless  
368 (Tim1) (**Supplementary figure 11, supplementary table 11 & 12**). *Timeout* doesn't cycle in our  
369 datasets.

370

371 We identified putative homologs for many secondary clock genes, including orthologs for *vriille*,  
372 *slmb/lin23*, *shaggy/GSK3*, and *doubletime/Ckl1e/KIN-20* (**Supplementary figure 12**). However,  
373 none of the orthologs or other homologues (**Supplementary tables 11 & 12**) have diel expression,  
374 even in the male head samples. Although *S. mansoni* orthologs of metazoan clock genes did not  
375 show 24-hour periodicity, we found 51 diel genes in *S. mansoni* whose ortholog in another animal  
376 also has ~24 hour oscillations in expression (**Supplementary tables 4 & 13**). *S. mansoni* has 24  
377 diel genes in common with *Drosophila melanogaster* (14 genes for male worms,  $p = 0.03927$ ; 15  
378 for females,  $p = 0.000687$ ), 32 with mouse (23 for male  $p = 0.5179$ ; 17 for females  $p = 0.6248$ ), and  
379 only 4 with another lophotrochozoan, the limpet *Cellana rota* (Schnytzer *et al.*, 2018) (4 for  
380 females  $p = 0.01117$ ; 2 for males  $p = 0.3675$ ).

381

## 382 **Discussion**

383 Growing evidence is revealing the importance of biological rhythms in parasites as a strategy to  
384 optimize survival within a host and transmission between hosts (Reece *et al.*, 2017). Behavioural  
385 patterns have been recorded for decades (Westwood *et al.*, 2019 and references therein), but only in  
386 the last five years, in unicellular parasites, have the underlying molecular oscillations that are  
387 responsible for these rhythms been investigated (Rijo-Ferreira *et al.*, 2017; Rijo-Ferreira *et al.*,  
388 2020). In this study, we have discovered the first 24-hour rhythms in the transcriptomes of a  
389 metazoan parasite; revealing that, like free-living animals, the effects of the earth's daily rotation  
390 influences the biology of this intravascular flatworm, indirectly, at least. Our study also provides the  
391 first insights into biological rhythms of adult *S. mansoni*. We have demonstrated that the  
392 transcriptomes of this parasite are not static over the daily cycle, however, the number of diel genes  
393 is low compared to other animals; e.g. 5.7% in the water flea, *Daphnia pulex* (Rund *et al.* 2016) and  
394 43% of protein coding genes in mouse show circadian rhythms, largely in an organ-specific manner  
395 (Zhang *et al.*, 2014). We believe there are two reasons for this. First, we pooled six whole animals  
396 from a mouse, and sampled three mice at each time point, so any variation in rhythms between host  
397 mice, between worms within a pool (from one mouse), and between tissues within each worm,  
398 could mask organ-specific oscillations. We expect that many more diel genes will be identified as  
399 specific cell types and organs are sampled at this temporal scale, facilitated by recent advances in  
400 single cell transcriptomic methods (Wang *et al.*, 2018; Wendt *et al.*, 2020; Diaz *et al.*, 2020).  
401 Second, we carried out an initial filtering step to exclude genes from our analysis that were not

402 significantly differentially expressed over a 24 hour period. The JTK\_Cycle method alone does not  
403 determine whether a transcript varies significantly over time. So this filtering step has reduced false  
404 positives, and enabled us to identify diel genes that cycle with high enough amplitudes to be  
405 detected in pooled, whole worm samples. The amplitudes of diel genes were also low compared to  
406 other animals e.g. median fold change of 2 in *D. pulex* (Rund *et al.* 2016); as diel genes in male  
407 head samples had a higher median amplitude than the whole-body samples this suggests that organ-  
408 specific cycling might have been dampened in our whole animal samples. The effects of daily  
409 oscillations in transcripts has implications for all future RNAseq and functional genomic studies in  
410 this species, and the identification of diel genes in this study will allow future experiments to take  
411 into account, and control for, the effects of oscillating transcripts.

412

413 We interpreted the daily rhythms in the transcriptomes of *S.mansoni* within the context of what is  
414 known about the daily oscillations in mouse vasculature (**Figure 6**). The putative function of  
415 *S. mansoni* diel genes and their cell type expression suggest that a number of host daily rhythms  
416 may be important zeitgebers to the worms' rhythms; i.e. heat shock triggers, immune and  
417 coagulation factors and insulin. The most striking 24-hour rhythm was the nocturnal increase in  
418 expression of genes involved in the unfolded protein and stress responses. This revealed  
419 rhythmicity in molecular chaperones that are implicated in a wide variety of cellular processes;  
420 stabilizing new proteins (Tissières *et al.* 1974), processing proteins damaged by environmental  
421 stressors (Rampelt *et al.*, 2012), and cell signalling (Stice & Knowlton 2008). Chaperones that have  
422 24-hour periodicity in other animals (and are orthologs of *S. mansoni* diel chaperones) are  
423 controlled by the circadian clock to regulate protein aggregation and toxicity (Xu *et al.*, 2019), and  
424 maintain the unfolded protein response (UPR) within a physiologically appropriate range (Eletto *et al.*  
425 *et al.*, 2014). In *S. mansoni*, increased UPR activity at night might be a response to, or anticipation of,  
426 periods of high ER-protein-folding demand that could be triggered by host cyclical rhythms, and  
427 this may be an adaptive stress response. One possible trigger is the daily body temperature cycle of  
428 the mouse, which increases by up to 4°C as it becomes active and starts feeding at the onset of the  
429 dark phase (Damiola *et al.*, 2000). Although a relatively moderate increase, this is enough to  
430 activate the mouse's own heat shock response (Reinke *et al.*, 2008). The daily body temperature  
431 cycles of the mouse also drive a rhythmic alternative splicing (AS) program in itself (Preusner *et al.*  
432 *et al.*, 2017). It is a possibility, therefore, that the increase in the mouse body temperature at night also  
433 drives a heat shock response and splicing activity in the worms. Several RNA-binding proteins are  
434 involved in splicing regulation in response to heat stress; Ser/Arg-rich splicing factors are known  
435 regulators after heat shock (Shin *et al.*, 2004), some hnrpH genes have a role in an arrest of mRNA  
436 splicing following heat shock (Honore, 2000; Mahe *et al.*, 1997), and Hsp70 is known to reactivate



437 mRNA splicing after heat inactivation (Vogel *et al.*, 1995). Orthologs of these genes in *S.mansoni*  
438 form part of the night-time interaction network in male worms (**Figure 2**). As temperature entrains  
439 circadian rhythms in *in vitro* populations of the blood-dwelling unicellular parasite, *Trypanosoma*  
440 *brucei* (Rijo-Ferriera *et al.*, 2017), it may be an important cyclical cue for *S.mansoni* as well. Other  
441 environmental stressors known to activate the heat shock pathway include hypoxia and reactive  
442 oxygen species (Kregel, 2002) and as mouse blood oxygen and glucose levels increase during the  
443 dark phase (Adamovich *et al.*, 2017; Llanos & de Vacarro, 1972), they could also induce the  
444 transcription of HSPs in *S. mansoni*. Circumstantial evidence points towards the nocturnal increased  
445 expression of heat shock and related genes being involved in proteotoxic stress (and hormone cell  
446 signalling) rather than a period of protein synthesis. This is because it is in anti-phase (at the  
447 opposite time of day) to rhythmic processes involved in translation regulation and protein synthesis,  
448 and it is synchronous with the mouse's active phase and accompanying increases in environmental  
449 stressors.

450

451 The most prominent day-time process was a single extended metabolic 'rush hour' that started at  
452 the beginning of the hosts resting phase. As feeding can act to gate the initiation of metabolic  
453 activities (Sonoda *et al.*, 2007) this may indicate a period of nutrient uptake in the worms.  
454 *S. mansoni* adults take up glucose and amino acids from the host blood directly across the tegument  
455 (Skelly *et al.*, 2014), and some diel metabolic genes are markers of tegumental cell types. Worms  
456 also ingest blood cells into the digestive system with females thought to feed continuously, and  
457 males intermittently (Skelly *et al.*, 2014), but there was no evidence of daily rhythms in genes  
458 involved in blood cell feeding. Insulin signalling, activated by host insulin, plays an important role  
459 in the growth, development and fecundity of schistosomes (Du *et al.*, 2017), and is known to  
460 influence the maturation of schistosome eggs and their movement into the intestine (You *et al.*,  
461 2012; You *et al.*, 2015). In mice, blood insulin levels peak at night (Feillet *et al.*, 2016, **Figure 6**).  
462 In the worms, throughout the night, transcript abundance of genes involved in the insulin signalling  
463 pathway increased, and so did egg-laying. It is possible, therefore, that the worms' increase in egg  
464 laying rates coincide with periods of higher host insulin levels. However, because this egg-laying  
465 experiment was carried out *in vitro*, and therefore in the absence of host cyclical cues, this pattern  
466 must be an endogenous rhythm. Host cues, like insulin, however, could act as zeitgebers to  
467 synchronise the parasites rhythms to that of its host.

468

469 Although elements of the circadian clock network are conserved across diverse animal lineages  
470 (Hardin, 2011; Takahashi, 2017), the more taxa that are investigated the greater the variation  
471 discovered (Bell-Pedersen *et al.*, 2005; Perrigault & Tran, 2017; Cook *et al.*, 2018). A daily

472 program of gene expression clearly exists in *S. mansoni* despite the lack of most of the canonical  
473 core clock gene orthologs. This suggests there is either an unusual oscillatory mechanism, or a  
474 functional endogenous clock has been lost and the *S. mansoni* rhythms are responding directly to  
475 host rhythms. The only core clock gene we found in the genome was *Timeout*, but it didn't show  
476 24-hour periodicity in expression. While its paralog, *Timeless*, functions as a canonical circadian  
477 clock gene in *Drosophila* and some other insects (Zheng & Sehgal, 2008; Iwai *et al.*, 2006; Zhu *et*  
478 *al.*, 2008), *Timeout* is a multifunctional gene. Indeed, *Timeout* plays an essential role in the  
479 maintenance of chromosome integrity, light entrainment of the circadian clock, embryonic  
480 development and regulation of DNA replication (Benna *et al.*, 2010; Gotter *et al.*, 2000; Gotter *et*  
481 *al.*, 2007), as well as a role in the mammalian circadian clock (Barnes *et al.*, 2003). It has circadian  
482 rhythms in the free-living flatworm *Schmidtea mediterranea* (Tsoumtsia *et al.*, 2017); and, in female  
483 parasitic fig wasps, it only becomes rhythmically expressed once the wasp has successfully  
484 dispersed from the dark cavity of the fig, suggesting that rhythmicity is light-dependent (Gu *et al.*,  
485 2014). The last common ancestor of the Bilateria is hypothesized to have had all core clock  
486 components; *Period*, *Timeless* and *Timeout*, *Clock*, *Cycle/Bmal1* and *Cryptochromes* (Reitzel *et al.*,  
487 2010), and combinations of these are present in extant Lophotrochozoa (Zantke *et al.*, 2013;  
488 Perrigault & Tran, 2017; Cook *et al.*, 2018). This suggests that *S. mansoni* has either lost all but  
489 *Timeout*, or these genes have diverged beyond recognition. *S. mansoni* orthologs of secondary clock  
490 genes did not show 24-hour periodicity. This could be a sampling artefact due to sequencing RNA  
491 from pooled, whole worm samples as clock gene rhythmicity may be limited to a subset of tissues  
492 (Whitmore *et al.*, 1998), or the phase of clock gene expression can vary between tissues and even  
493 between cells within a tissue (Escamilla-Chimal *et al.*, 2010; Wen *et al.*, 2020). However, even in  
494 the male head samples (containing a subset of organs and tissues) there was still no 24-hour cycling  
495 of any putative clock gene transcripts. Alternative explanations for lack of 24-hour periodicity  
496 could be that they do not have rhythmicity at the transcript level, and/or may have non-clock  
497 functions. The adaptive advantage of a clock in environments with neither light nor very high-  
498 amplitude environmental cycles is less obvious (Olmedo *et al.*, 2012). If, however, in future studies,  
499 any of these daily rhythms are discovered to be endogenous circadian rhythms, then our findings  
500 suggest that the *S. mansoni* clockwork must be quite distinct from that in other animals, and novel  
501 endogenous oscillators may be discovered within our list of diel genes.

502

503 Despite the profound global impact of schistosomiasis, there is complete reliance on only a single  
504 drug (praziquantel) for treatment, and evidence of reduced susceptibility in some schistosome  
505 populations (Ismail *et al.*, 1996; Crellen *et al.*, 2016), raises the spectre of drug resistance rendering  
506 current control measures ineffective. Consequently, there is a drive to develop a new generation of

507 therapeutics based on schistosome genomes and their function (e.g. Berriman *et al.*, 2009; Crosnier  
508 *et al.*, 2020; Wang *et al.*, 2020). Understanding the rhythms of target genes and their products will  
509 determine how an organ, or organism, will respond to a drug at a specific time of the day, and the  
510 timing of drug delivery could have a large impact on the effectiveness of target activation or  
511 inhibition (Cederroth *et al.*, 2019). An RNAi screen to uncover new therapeutic targets in  
512 *S. mansoni* identified 195 genes that caused parasite detachment and affected survival (Wang *et al.*,  
513 2020), eight of which we have identified as diel genes (**Supplementary table 4**), including *Hsp90*  
514 (Smp\_072330) that demonstrated very high amplitudes in both sexes. By searching the ChEMBL  
515 database (Mendez *et al.*, 2019), we identified existing drugs that are predicted to target the encoded  
516 protein of 26 diel genes, 12 of which are phase IV approved drugs (i.e. with the best safety record  
517 for humans), including four metabolic chokepoints (**Supplementary table 14**). The diel genes with  
518 the highest amplitudes in each dataset are all putative drug targets, for example *SmKI-1*  
519 (Smp\_307450) has four phase IV compounds that are predicted to target it, and it is also a proposed  
520 vaccine candidate (Hernandez-Goenaga *et al.* 2019). Therefore our fine temporal scale analyses of  
521 the *S. mansoni* transcriptomes will provide a useful foundation for the development and delivery of  
522 new therapeutics. Although we have described daily rhythms in schistosomes collected from  
523 nocturnal mice, we can assume that some of these rhythms will be inverted in worms infecting  
524 diurnal humans. The development of new therapeutics against schistosomiasis should include  
525 chronobiological information from the parasite and host wherever possible, and investigating  
526 further the temporal periods of parasite vulnerability (e.g. the stress response) and metabolic  
527 chokepoint activity (during the metabolic rush hour) holds promise for improving human health.

528

## 529 **Conclusions**

530 Schistosome adults live in the bloodstream of a mammalian host, which is a 24-hour rhythmic  
531 environment. Our finding that *S. mansoni* adults have daily rhythms in their transcriptomes is,  
532 therefore, not surprising. These daily rhythms in the parasite may be driven by host rhythms, either  
533 directly, and/or generated by an intrinsic circadian clock that is entrained to host cues. What is  
534 surprising, however, is that exploration of the genome revealed a lack of core clock genes that are  
535 generally conserved across other animals, and this is suggestive of an unusual oscillatory  
536 mechanism or loss of a functional endogenous clock. Our identification of diel genes and daily  
537 processes has revealed fine-scale temporal partitioning of biological processes, some of which may  
538 serve the particular time-of-day challenges of life within the host; e.g. a proteotoxic stress response,  
539 host immune system modulation and anti-coagulation activity. Future studies will examine how  
540 these rhythmic accumulations of mRNA abundance in *S.mansoni*; i) are generated; i.e. the balance

541 between synthesis and degradation; ii) are propagated, i.e. imposed by the host versus endogenously  
542 controlled by the parasite itself; and iii) if they eventually exert functions.

543

## 544 **Methods**

545

### 546 **Ethics statement**

547

548 The life cycle of *Schistosoma mansoni* NMRI (Puerto Rican) strain is maintained at the Wellcome  
549 Sanger Institute (WSI) by breeding and infecting susceptible *Biomphalaria glabrata* snails and  
550 mice. The procedures involving animals were conducted under the Home Office Project Licence  
551 No. P77E8A062 held by GR. All protocols were revised and approved by the Animal Welfare and  
552 Ethical Review Body (AWERB) of the WSI. The AWERB is constituted as required by the UK  
553 Animals (Scientific Procedures) Act 1986 Amendment Regulations 2012.

554

### 555 **Animal procedures**

556

557 Female Balb/c mice were bred at the WSI, and maintained on individual air handling units at 19 to  
558 23°C and 45–65% humidity. Animals were given access to food and water ad libitum, maintained  
559 on a 12-hour light/dark cycle, and housed in groups of no more than 5 adults per cage. Welfare  
560 assessments are carried out daily, abnormal signs of behaviour or clinical signs of concern are  
561 reported. All personnel at the WSI performing welfare checks on animals are trained and assessed  
562 as competent by qualified named individuals.

563

564 Thirty-six 6 weeks old female were percutaneously infected with 200 mixed-sex *Schistosoma*  
565 *mansoni* cercariae collected from 13 infected snails as described (Crosnier *et al.*, 2019). In brief,  
566 under isoflurane anaesthesia, the mice were carefully transferred onto individual holders in a  
567 bespoke pre-warmed anaesthesia rig and their tails inserted into the test tubes containing with the  
568 cercariae. After 40 minutes exposure, animals are removed from the anaesthesia rigs, placed back  
569 into their cage and monitored until full recovery from the anaesthesia. For parasite collection  
570 (below) mice were euthanised by intraperitoneal injection of 200 µl of 200 mg/ml pentobarbital  
571 (Dolethal®) supplemented with 100 U/ml heparin (cat.# H3393, Sigma Aldrich), and adult worms  
572 recovered by portal perfusion (the portal vein is sectioned followed by intracardiac perfusion with  
573 phenol-red-free DMEM, cat.# 31053-044 ThermoFisher Scientific, containing 10 U/mL heparin)

574

### 575 **Parasite collection**

576

577 At 42 days post infection, groups of 3 mice were perfused every 4 hours for 44 hours, and the adult  
578 worms collected. The worms sampled in the dark phase were collected from mice euthanized under

579 red light conditions. We collected worm samples 30 minutes after lights on (Zeitgeber time (ZT)  
580 0.5) and then 4 hours subsequently giving us collection times of ZT:0.5, 4.5, 8.5, 12.5, 16.5, 20.5  
581 over two 24hr periods. ZT:0.5 corresponds to 8am in the human 24hr clock, so actual collection  
582 times were 08:00, 12:00, 16:00, 20:00, 00:00, 04:00. At each collection time worms were washed in  
583 serum-free DMEM media at 37°C. Mature, paired male and female worms from each mouse were  
584 separated and six female worms were pooled and stored in TRIzol at -80°C, and the same for six  
585 male worms. A further 10 male worms were pooled from each mouse and fixed and stored in  
586 *vivoPhix* (RNAssist Ltd, Cambridge, UK) at 4°C for the dissection of heads later. We used male  
587 heads only as they are bigger and easier to dissect than female heads. RNA was extracted from each  
588 pool and sequenced (**Figure 1A**). From each mouse at each time point, we therefore collected  
589 material simultaneously for 3 time-series datasets: pooled females, pooled males and pooled male  
590 heads, with 36 samples in each dataset.

### 591 592 **RNA isolation, library preparation and transcriptome sequencing** 593

594 RNA was isolated from the pooled whole worm samples in TRIzol reagent according to the  
595 manufacturer's instructions (Life Technologies). For the male head samples, ten additional male  
596 worms per mouse per time point were dissected in *vivoPhix* by cutting posterior to the ventral  
597 sucker and anterior to the testes. The heads were rinsed in 50% ethanol and pooled in TRIzol and  
598 the RNA extracted as for the whole worm samples. RNA quality was assessed using a Pico RNA kit  
599 for the BioAnalyzer (Agilent). We were unable to extract good quality RNA from 4 male head  
600 samples (day1\_20:00\_b; day1\_00:00\_b; day2\_04:00\_a; day2\_04:00\_6). Total RNA was enriched  
601 for mRNA using poly(A) pulldown. The sequencing libraries were prepared using the NEB Ultra II  
602 RNA custom kit on an Agilent Bravo WS automation system. All samples had 14 cycles of PCR,  
603 which was set-up using Kapa HiFi Hot start mix and Eurofins dual indexed tag barcodes on Agilent  
604 Bravo WS automation system. RNA sequencing of the pooled worm libraries was performed on six  
605 lanes of the Illumina HiSeq2500 v4 75 Paired End sequencing platform. All sequencing data are  
606 available through ENA study accession number ERP108923.

### 607 608 **Identification of diel cycling transcripts** 609

610 Read quality was assessed using the FASTQC quality control tool. Raw reads were mapped to the  
611 *Schistosoma mansoni* genome (version 7, WormBaseParaSite (WBPS version 14, WS271)) using  
612 STAR (Dobin, 2013). Genes with fewer than 10 reads mapping across all samples were excluded.  
613 Read counts were normalised using DESeq2 v1.22.2 (Love *et al.*, 2014) with default parameters  
614 and the variance stabilising transformation. Principal Components Analysis was then used to

615 exclude outlier samples by comparing them to replicates. One male sample (day1\_12:00\_a), two  
616 male head samples (day2\_20:00\_b; day2\_20:00\_c) and no female samples were excluded.

617

618 To reduce false positive calls of cycling genes, we first excluded genes which were not  
619 differentially expressed across the time course using the GLM approach in edgeR v3.24.3  
620 (Robinson *et al.*, 2010). Initially only genes with Counts Per Million (CPM) greater than three  
621 across at least three samples were included in the analysis. In the model design replicates for  
622 equivalent Circadian time in each of the two 24h periods were considered as the same time point.  
623 Genes with a False Discovery Rate (FDR) greater than 0.05 were then excluded.

624

625 To identify cycling genes, we used JTK\_cycle (Hughes *et al.*, 2010), called using the meta2d  
626 function from the MetaCycle software (Wu *et al.*, 2016). Default parameters were used i.e.  
627 minimum period 20 hours, maximum period 28 hours. Genes with an FDR < 0.01 (JTK BH.Q  
628 <0.01) were called as cycling. For visualisation of cycling gene expression, normalised counts for  
629 replicates were averaged and then log-transformed to generate heatmaps using the *pheatmap*  
630 package with the option scale = 'row'. The fold change of gene expression over the time points  
631 was calculated as the max (peak)/ min (trough), keeping replicates separate.

632

### 633 **Identification of drug targets**

634

635 Drugs from the ChEMBL database that we predict to interact with the cycling genes were identified  
636 using the approach described in Wang *et al.* (2020).

637

### 638 **Gene Ontology enrichment analysis of cycling genes**

639

640 To better understand the function of genes identified as cycling, we performed Gene Ontology (GO)  
641 enrichment analysis of our gene lists using topGO (Alexa *et al.*, 2006), with FDR < 0.05, node\_size  
642 = 5, method = 'weight01', statistic = 'Fisher'. GO terms for *S. mansoni* were downloaded from  
643 WormBase Parasite using BioMart (Howe *et al.*, 2016) on the 5th March 2020.

644

### 645 **KEGG pathway mapping**

646

647 Mapping of *S. mansoni* gene products to the KEGG pathway database was performed on the KAAS  
648 server (<https://www.genome.jp/kegg/kaas/>) using the GHOSTX program and BBH method. The  
649 significance of cycling gene enrichment in pathways was assessed using Fisher's Exact test and  
650 resulting P-values were adjusted using the Benjamini-Hochberg procedure, where maps in the  
651 KEGG categories 1-4 (<https://www.genome.jp/kegg/pathway.html>) were tested. Pathways with

652 FDR < 0.05 were considered as significant. For visualisation the R package Pathview (Luo *et al.*,  
653 2013) was used.

654

### 655 **Molecular interactions analysis**

656 Molecular interactions were predicted using the online search tool STRING ([www.string-db.org](http://www.string-db.org); V  
657 11)(Szkarczyk *et al.*, 2015). The *S. mansoni* V7 gene identifiers for diel gene were converted to *S.*  
658 *mansoni* V5 gene identifiers. The protein sequences for V5 gene identifiers were analysed in  
659 STRINGdb. Protein sequences for day-time peaking genes for each dataset were entered as a  
660 multiple protein search. Default settings were used to predict interactions with a minimum  
661 interaction (confidence) score of 0.4, corresponding to medium level of confidence. A second  
662 identical analysis was carried out for night time peaking genes in male and female worms.

663

### 664 **Single cell data analysis**

665

666 We used publicly available single cell transcriptome data from mature adult male and female  
667 worms (Wendt *et al.*, 2020) to determine if cycling transcripts were specific to a certain cell type  
668 (i.e. cell type markers), specific to a category of cell types (e.g. muscle, neurons, germline,  
669 tegument lineage etc), or more broadly expressed and found in more than one category of cell type.  
670 Processed single-cell RNA-seq data were provided by the authors (R object  
671 Whole\_Integrate\_rmv27\_50\_RN.rds). We used the hypergeometric test to determine whether each  
672 cell type cluster contained more marker genes called cycling in our datasets than expected by  
673 chance. This was done separately for each of the male, female and male head datasets. The resulting  
674 p-values were corrected using the Benjamini-Hochberg method. A Python script implementing this  
675 method is available from our GitHub page  
676 ([https://github.com/adamjamesreid/schistosoma\\_daily\\_rhythms/](https://github.com/adamjamesreid/schistosoma_daily_rhythms/)).

677

678 Seurat UMAP plots were used to explore the expression of cycling transcripts across cell types and  
679 whether they were ubiquitously expressed or enriched, or specific, to one or more cell type (Stuart  
680 *et al.*, 2019). Some of the cycling transcripts identified as cell type markers and enriched in specific  
681 cell types were validated by *in situ* hybridization (below).

682

### 683 **Identification of hypothetical proteins**

684

685 Amino acid sequences for the ten diel hypothetical proteins were obtained from WormBaseParasite.  
686 Protein 3D structures were predicted from amino acid sequences using I-TASSER online

687 server(v5.0) (Yang *et al.*, 2015) with default parameters. TM-scores indicate similarity between two  
688 structures. The values range from 0-1, with the value of 1 indicating a perfect match.

689

### 690 ***Fluorescent in situ* hybridisation and imaging**

691

692 Mature adult pairs, collected from mice infected for life cycle maintenance and parasite material  
693 production, were anaesthetised in 0.5% solution of ethyl 3-aminobenzoate methanesulfonate  
694 (Sigma-Aldrich, St. Louis, MO) for 15 minutes to separate male and female worms. The worms  
695 were killed in 0.6 M MgCl<sub>2</sub> for 1 min, and incubated in 4% formaldehyde in PBSTx (1xPBS +  
696 0.3% TritonX) for 4 hours at room temperature. They were rinsed 3 x 5minutes in PBSTx,  
697 dehydrated into 100% Methanol and stored at -20C. Samples were gradually rehydrated in PBSTx  
698 over 30minutes and incubated in 5ug/ml Proteinase K (Invitrogen) in 1x PBSTx for 30 minutes at  
699 37°C. They were post-fixed in 4% Formaldehyde in PBSTx for 10 min at room temperature then  
700 rinsed in PBSTx for 10 minutes. Probes, buffers, and hairpins for third generation *in situ*  
701 hybridization chain reaction (HCR) experiments were purchased from Molecular Instruments (Los  
702 Angeles, California, USA). Experiments were performed following the protocol described by Choi  
703 *et al.* (2016; 2018) and developed for wholemount nematode larvae. Samples were mounted using  
704 DAPI fluoromount-G (Southern Biotech) and imaged on a confocal laser microscope (Sp8 Leica).

705

### 706 ***In vitro* egg laying assay**

707 Twelve freshly perfused pairs of adult worms (still coupled) were placed into individual wells of a  
708 12-well plate containing 3 ml of ABC169 media (Wang *et al.*, 2019) and kept at 37°C, 5%CO<sub>2</sub> in  
709 the dark. Eggs from each well were collected, and counted, at 8am and 8pm every day for 72 hours,  
710 giving 3 day-time counts and 3 night-time counts per worm couple. The first 12 hour period post-  
711 perfusion was discounted to allow the worms to acclimate to the *in vitro* conditions. This  
712 experiment was replicated 3 times, each time with freshly perfused worms. The median egg number  
713 for each worm for day-time, and night-time was calculated and a paired Wilcoxon test was carried  
714 out to determine if there was a significant difference in the number of eggs laid between day or  
715 night.

716

### 717 **Identification of core, and secondary, circadian clock genes in *Schistosoma mansoni***

718

719 We identified putative *Schistosoma mansoni* homologues of animal circadian clock genes using two  
720 methodologies. The first was a BLASTP sequence similarity search with a cut off e-value of 1e-10  
721 against the *S. mansoni* genome (v7) in WormBaseParaSite (WBPS version 14, WS271), using  
722 previously defined circadian proteins sequences from UniProtKB (Boutet *et al.*2007) and GenBank



723 **(Supplementary Table 9)**. Our second method enhanced the robustness of our searches by using  
724 respective domains of proteins to identify putative orthologues, as shown before (Padalino *et al.*  
725 2018). Briefly, domain identifiers for main clock proteins were selected using Pfam and SMART,  
726 and their respective signatures were used to query the BioMart function in WBPS against the entire  
727 *S. mansoni* genome (**Supplementary Table 10**). A BLASTP of output sequences in NCBI  
728 (Altschul *et al.* 1990) was used to identify these proteins, and all respective hits were aligned in  
729 Jalview 2 and illustrated in IBS illustrator (Liu *et al.* 2015).

730  
731 To examine whether hits were orthologous to circadian clock proteins from other animals,  
732 phylogenetic analyses on the core clock components were conducted; Timeless/Timeout,  
733 Cycle/BMAL1/Arntl and Clock (all are basic helix-loop-helix-PAS proteins) and the  
734 Cryptochromes/ Photolyases, and the secondary clock proteins; Vrille, Slmb, Shaggy and  
735 Doubletime. Sequences were aligned using CLUSTAL OMEGA (Sievers *et al.* 2011) and visually  
736 examined using Jalview 2 (Waterhouse *et al.* 2009). The aligned sequences were exported into  
737 Gblocks 0.91b (Castresana, 2000) with allowance for smaller blocks and less strict flanking  
738 positions for reduced stringency. Conserved positions (3% for bHLH/PAS, 9% for CDP photolyase,  
739 16% for timeless) were used to construct a Neighbour-Joining phylogenetic tree (JTT model) with  
740 partial/pairwise deletion and 1000 bootstrap replications in MEGA-X (Kumar *et al.* 2018).

741

#### 742 **Comparison of diel 1-to-1 orthologs in *Schistosoma mansoni* and other Metazoa**

743

744 We identified 2925 cycling genes in *Drosophila melanogaster* from the Cycling Gene Data Base  
745 (CGDB; Li *et al.*, 2017) and 3233 *S. mansoni*-*D. melanogaster* one-to-one orthologues from  
746 Wormbase Parasite (Bolt *et al.*, 2018). Of the one-to-one orthologues, 420 cycled in *D.*  
747 *melanogaster*, 66 in *S. mansoni* males, 48 in females. For mouse, we identified 9534 cycling genes  
748 from CGDB and 2855 one-to-one orthologues with *S. mansoni* using Wormbase Parasite. 1146  
749 shared orthologues were cycling in mouse, 57 in male, 44 in female. To examine common cycling  
750 genes between *S. mansoni* and another lophotrochozoan, we used the 221 cycling limpet (*Cellana*  
751 *rota*) transcripts identified by Schnytzer *et al.* (2018). A total of 38,482 limpet translated transcript  
752 sequences were used with 14499 sequences from *S. mansoni* (WBPS15) to identify one-to-one  
753 orthologues using OrthoFinder (Emms & Kelly, 2019). Here we looked for shared orthogroups  
754 rather than one-to-one orthologues due to the fragmented nature of the limpet transcriptome  
755 assembly. There were 5025 shared orthogroups between limpet and *S. mansoni*. 67 limpet cyclers  
756 and 96 *S. mansoni* cyclers were in shared orthogroups. We used the Fisher exact test to determine  
757 whether the number of one-to-one orthologues cycling in both species was greater than expected by  
758 chance.

759

## 760 **Acknowledgements**

761

762 We thank all members of the Parasite Genomics team at the Wellcome Sanger Institute for their  
763 comments and input on this study. We thank the animal facility staff – Simon Clare and his team,  
764 and David Goulding of the Electron and Advanced Light Microscope Facility for their support &  
765 assistance in this work. We thank Jim Collins and his lab for helpful discussion. The infrastructure  
766 used for this analysis is maintained by the core IT Service and the Pathogen Informatics teams at  
767 Wellcome Sanger Institute. The research was supported by a Wellcome Trust Janet Thornton  
768 Fellowship (WT206194) to KR.

769

770

## 771 **Competing interests**

772

773 The authors declare that no competing interests exist.

774

## 775 **References**

776

777 Adamovich Y, Ladeuix B, Golik M, Koeners MP, Asher G (2017) Rhythmic oxygen levels reset  
778 circadian clocks through HIF1 $\alpha$ . *Cell Metab.* 25 93–101. doi:10.1016/j.cmet.2016.09.014

779

780 Alexa A, Rahnenführer J, Lengauer T (2006) Improved scoring of functional groups from gene  
781 expression data by decorrelating GO graph structure. *Bioinformatics* 22:1600-7.  
782 doi:10.1093/bioinformatics/btl140.

783

784 Altschul SF, Gish W, Miller W, Myers EW, Lipman DJ (1990) Basic local alignment search tool.  
785 *Journal of Molecular Biology.* 215:403-410. doi:10.1016/S0022-2836(05)80360-2.

786

787 Ash C, Dubec M, Donne K, Bashford T (2017) Effect of wavelength and beam width on penetration  
788 in light-tissue interaction using computational methods. *Lasers Med Sci* 32:1909-1918.  
789 doi:10.1007/s10103-017-2317-4.

790

791 Barnes JW, Tischkau SA, Barnes JA, Mitchell JW, Burgoon PW, Hickok JR, Gillette MU. (2003)  
792 Requirement of mammalian Timeless for circadian rhythmicity. *Science.* 302 (5644): 439-42.  
793 doi:10.1126/science.1086593.

794

795 Benna C, Bonaccorsi S, Wülbeck C, Helfrich-Förster C, Gatti M, Kyriacou CP, Costa R, Sandrelli  
796 F (2010) *Drosophila* timeless2 is required for chromosome stability and circadian photoreception.  
797 *Curr Biol.* 23;20(4):346-52. doi:10.1016/j.cub.2009.12.048.

798

799 Berriman M, Haas BJ, LoVerde PT, Wilson RA, Dillon GP, Cerqueira GC, Mashiyama ST, Al-  
800 Lazikani B, Andrade LF, Ashton PD, Aslett MA, Bartholomeu DC, Blandin G, Caffrey CR,  
801 Coghlan A, Coulson R, Day TA, Delcher A, DeMarco R, Djikeng A, Eyre T, Gamble JA, Ghedin  
802 E, Gu Y, Hertz-Fowler C, Hirai H, Hirai Y, Houston R, Ivens A, Johnston DA, Lacerda D, Macedo  
803 CD, McVeigh P, Ning Z, Oliveira G, Overington JP, Parkhill J, Pertea M, Pierce RJ, Protasio AV,  
804 Quail MA, Rajandream MA, Rogers J, Sajid M, Salzberg SL, Stanke M, Tivey AR, White O,  
805 Williams DL, Wortman J, Wu W, Zamanian M, Zerlotini A, Fraser-Liggett CM, Barrell BG, El-  
806 Sayed NM. (2009) The genome of the blood fluke *Schistosoma mansoni*. *Nature* 460  
807 (7253):352-8. doi:10.1038/nature08160.

808

- 809 Bolt BJ, Rodgers FH, Shafie M, Kersey PJ, Berriman M, Howe KL. Using WormBase ParaSite: An  
810 Integrated Platform for Exploring Helminth Genomic Data. *Methods Mol Biol.* 2018;1757:471-491.  
811 doi: 10.1007/978-1-4939-7737-6\_15. PMID: 29761467.
- 812
- 813 Boutet E, Lieberherr D, Tognolli M, Schneider M, Bairoch A. (2007) UniProtKB/Swiss-Prot.  
814 *Methods Mol Biol.* 406:89-112. doi: 10.1007/978-1-59745-535-0\_4.
- 815
- 816 Bell-Pedersen D, Cassone VM, Earnest DJ, Golden SS, Hardin PE, Thomas TL, Zoran MJ.  
817 Circadian rhythms from multiple oscillators: lessons from diverse organisms. *Nat Rev Genet.* 2005  
818 Jul;6(7):544-56. doi: 10.1038/nrg1633. PMID: 15951747; PMCID: PMC2735866.
- 819 Bertolucci C, Pinotti M, Colognesi I, Foà A, Bernardi F, Portaluppi F (2005) Circadian rhythms in  
820 mouse blood coagulation. *J Bio Rhythms*, 20, 219-224. doi:10.1177/0748730405275654
- 821 Catalano S, Sène M, Diouf ND, Fall CB, Borlase A, Léger E, Bâ K, Webster JP (2018) Rodents as  
822 Natural Hosts of Zoonotic *Schistosoma* Species and Hybrids: An Epidemiological and Evolutionary  
823 Perspective From West Africa, *The Journal of Infectious Diseases*, Volume 218, Issue 3, 429–  
824 433, <https://doi.org/10.1093/infdis/jiy029>
- 825 Castresana J (2000) Selection of conserved blocks from multiple alignments for their use in  
826 phylogenetic analysis. *Mol Biol Evol.* 17(4):540-52.
- 827 Cederroth CR, Albrecht U, Bass J, Brown SA, Dyhrfjeld-Johnsen J, Gachon F, Green CB, Hastings  
828 MH, Helfrich-Förster C, Hogenesch JB, Lévi F, Loudon A, Lundkvist GB, Meijer JH, Rosbash M,  
829 Takahashi JS, Young M, Canlon B (2019) Medicine in the fourth dimension *Cell Metab* 30:238-250  
830 doi:10.1016/j.cmet2019.06.019
- 831 Chalmers, I.W., McArdle, A.J., Coulson, R.M. *et al.* Developmentally regulated expression,  
832 alternative splicing and distinct sub-groupings in members of the *Schistosoma mansoni* venom  
833 allergen-like (SmVAL) gene family. *BMC Genomics* 9, 89 (2008). [https://doi.org/10.1186/1471-](https://doi.org/10.1186/1471-2164-9-89)  
834 2164-9-89
- 835
- 836 Cheung-Flynn J, Prapapanich V, Cox MB, Riggs DL, Suarez-Quian C, Smith DF (2005)  
837 Physiological role for the cochaperone FKBP52 in androgen receptor signalling. *Mol Endocrinol.*  
838 19:1654-66. doi: 10.1210/me.2005-0071.
- 839
- 840 Choi HMT, Calvert CR, Husain N, Huss D, Barsi JC, Deverman BE, Hunter RC, Kato M, Lee SM,  
841 Abelin ACT, et al. (2016). Mapping a multiplexed zoo of mRNA expression. *Development* 143,  
842 3632-3637. doi:10.1242/dev.140137
- 843
- 844 Choi HMT, Schwarzkopf M, Fornace ME, Acharya A, Artavanis G, Stegmaier J, Cunha A, Pierce  
845 NA (2018) Third-generation *in situ* hybridization chain reaction: multiplexed, quantitative,  
846 sensitive, versatile, robust. *Development* 145: dev165753 doi: 10.1242/dev.165753
- 847
- 848 Cook GM, Gruen AE, Morris J, Pankey MS, Senatore A, Katz PS, Watson WH 3rd, Newcomb JM  
849 (2018) Sequences of circadian clock proteins in the Nudibranch Molluscs *Hermisenda*  
850 *crassicornis*, *Melibe leonina*, and *Tritonia diomedea*. *Biol Bull.* 234(3):207-218. doi:  
851 10.1086/698467.
- 852
- 853 Crellen T, Walker M, Lamberton PH, Kabatereine NB, Tukahebwa EM, Cotton JA, Webster JP  
854 (2016) Reduced efficacy of praziquantel against *Schistosoma mansoni* is associated with multiple  
855 rounds of mass drug administration. *Clin Infect Dis.* 63(9):1151-1159. doi: 10.1093/cid/ciw506.

856

857 Crosnier C, Brandt C, Rinaldi G McCarthy C, Barker C, Clare S, Berriman M, Wright GJ  
858 (2019) Systematic screening of 96 *Schistosoma mansoni* cell-surface and secreted antigens does not  
859 identify any strongly protective vaccine candidates in a mouse model of infection. Wellcome Open  
860 Research, 4:159 doi.org/10.12688/wellcomeopenres.15487.1

861

862 Crosnier C, Hokke CH, Protasio AV, Brandt C, Rinaldi G, Langenberg MCC, Clare S, Janse JJ,  
863 Shona Wilson, Matthew Berriman, Meta Roestenberg, Gavin J Wright (2020) Screening of a library  
864 of recombinant *Schistosoma mansoni* proteins with sera from murine and human controlled  
865 infections identifies early serological markers, *The Journal of Infectious Diseases*  
866 doi.org/10.1093/infdis/jiaa329

867

868 Curtis AM, Cheng Y, Kapoor S, Reilly D, Price TS, FitzFerald GA (2007) Circadian variation of  
869 blood pressure and the vascular response to asynchronous stress. PNAS 104:3450-3455.  
870 doi.org/10.1073/pnas.0611680104

871

872 Da'dara AA, Angeli A, Ferraroni M, Supuran CT, Skelly PJ. Crystal structure and chemical  
873 inhibition of essential schistosome host-interactive virulence factor carbonic anhydrase  
874 SmCA. *Commun Biol.* 2019;2:333. Published 2019 Sep 5. doi:10.1038/s42003-019-0578-0

875

876 Damiola F., Le Minh N., Preitner N., Kornmann B., Fleury-Olela F., Schibler U. (2000) Restricted  
877 feeding uncouples circadian oscillators in peripheral tissues from the central pacemaker in the  
878 suprachiasmatic nucleus. *Genes & Dev.* 14:2950–2961.

879

880 De Filippo K, Rankin SM. (2018) CXCR4, the master regulator of neutrophil trafficking in  
881 homeostasis and disease. *Eur J Clin Invest.* 48 Suppl 2; e12949. doi: 10.1111/eci.12949.

882

883 Diaz Soria, C.L., Lee, J., Chong, T. Tracey A, Young MD, Andrews T, Hall Cm Ng BL, Rawlinson  
884 K, Doyle SR, Leonard S, Lu Z, Bennett HM, Rinaldi G, Newmark PA, Berriman M (2020) Single-  
885 cell atlas of the first intra-mammalian developmental stage of the human parasite *Schistosoma*  
886 *mansoni*. *Nat Commun* 11, 6411 (2020). <https://doi.org/10.1038/s41467-020-20092-5>

887

888 Dobin A, Davis CA, Schlesinger F, Drenkow J, Zaleski C, Jha S, Batut P, Chaisson M, Gingeras  
889 TR (2013) STAR: ultrafast universal RNA-seq aligner, *Bioinformatics* 29: 15–21.  
890 <https://doi.org/10.1093/bioinformatics/bts635>

891

892 Du, X., McManus, D.P., Cai, P. et al.(2017) Identification and functional characterisation of a  
893 *Schistosoma japonicum* insulin-like peptide. *Parasites Vectors* 10, 181.  
894 <https://doi.org/10.1186/s13071-017-2095-7>

895

896 Ebersberger, I., Knobloch, J. & Kunz, W. (2005) Cracks in the shell—zooming in on eggshell  
897 formation in the human parasite *Schistosoma mansoni*. *Dev Genes Evol* 215, 261–267.  
898 <https://doi.org/10.1007/s00427-005-0467-z>

899

900 Eletto D, Eletto D, Dersh D, Gidalevitz T, Argon Y. Protein disulfide isomerase A6 controls the  
901 decay of IRE1 $\alpha$  signaling via disulfide-dependent association. *Mol Cell.* 2014 Feb 20;53(4):562-  
902 576. doi: 10.1016/j.molcel.2014.01.004. Epub 2014 Feb 6. PMID: 24508390; PMCID:  
903 PMC3977204.

904

905 Emms DM, Kelly S. OrthoFinder: phylogenetic orthology inference for comparative genomics.  
906 *Genome Biol.* 2019 Nov 14;20(1):238. doi: 10.1186/s13059-019-1832-y. PMID: 31727128;  
907 PMCID: PMC6857279.

- 908  
909 Escamilla-Chimal EG, Velázquez-Amado RM, Fiordeliso T, Fanjul-Moles ML. (2010) Putative  
910 pacemakers of crayfish show clock proteins interlocked with circadian oscillations. *J Exp Biol.*  
911 213(Pt 21):3723-33. doi: 10.1242/jeb.047548.  
912  
913 Feillet C, Guérin S, Lonchampt M, Dacquet C, Gustafsson JA, Delaunay F, Teboul (2016) Sexual  
914 dimorphism in circadian physiology is altered in LXR $\alpha$  deficient mice. *PLoS ONE* 11(3):  
915 e0150665. doi:10.1371/journal.pone.0150665
- 916 Global Burden of Disease Study 2019 (GBD 2019) Results [Global Burden of Disease  
917 Collaborative Network] *Institute for Health Metrics and Evaluation (IHME)*  
918  
919 Gotter AL, Manganaro T, Weaver DR, Kolakowski LF Jr, Possidente B, Sriram S, MacLaughlin  
920 DT, Reppert SM. (2000) A time-less function for mouse timeless. *Nat Neurosci.* 3(8):755-6. doi:  
921 10.1038/77653.  
922  
923 Gotter AL, Suppa C, Emanuel BS. (2007) Mammalian TIMELESS and Tipin are evolutionarily  
924 conserved replication fork-associated factors. *J Mol Biol.* 9;366(1):36-52. doi:  
925 10.1016/j.jmb.2006.10.097.  
926  
927 Grover P, Asa, JS, Campos EI (2018) H3-H4 Histone Chaperone Pathways. *Annu. Rev. Genet.*52:  
928 109-130 doi: 10.1146/annurev-genet-120417-031547  
929  
930 Gu HF, Xiao JH, Niu LM, Wang B, Ma GC, Dunn DW, Huang DW. (2014) Adaptive evolution of  
931 the circadian gene timeout in insects. *Sci Rep.* 4:4212. doi: 10.1038/srep04212.  
932  
933 Hardin PE. (2011) Molecular genetic analysis of circadian timekeeping in *Drosophila*. *Adv. Genet.*  
934 74, 141–173. doi.org/10.1016/B978-0-12-387690-4.00005-2  
935  
936 Harris AR, Russell RJ, Charters AD. A review of schistosomiasis in immigrants in Western  
937 Australia, demonstrating the unusual longevity of *Schistosoma mansoni*. *Trans R Soc Trop Med*  
938 *Hyg.* 1984;78(3):385-8. doi: 10.1016/0035-9203(84)90129-9. PMID: 6464135.  
939  
940 Hernández-Goenaga J, López-Abán J, Protasio AV, Vicente Santiago B, Del Olmo E, Vanegas M,  
941 Fernández-Soto P, Patarroyo MA, Muro A. (2019) Peptides derived of kunitz-type serine protease  
942 inhibitor as potential vaccine against experimental Schistosomiasis. *Front Immunol.* 10:2498. doi:  
943 10.3389/fimmu.2019.02498.  
944  
945 Honoré B. (2000) The hnRNP 2H9 gene, which is involved in the splicing reaction, is a multiply  
946 spliced gene. *Biochim Biophys Acta.* 1492(1):108-19. doi: 10.1016/s0167-4781(00)00092-0.  
947  
948 Howe KL, Bolt BJ, Shafie M, Kersey P, Berriman M (2016) WormBase ParaSite - a comprehensive  
949 resource for helminth genomics. *Mol Biochem Parasitol* 215:2-10.doi:  
950 10.1016/j.molbiopara.2016.11.005.  
951  
952 Hughes ME, Hogenesch JB, Kornacker K (2010) JTK\_CYCLE: an efficient nonparametric  
953 algorithm for detecting rhythmic components in genome-scale data sets *J Biol Rhythms* 25:372-  
954 80. doi: 10.1177/0748730410379711.  
955  
956 International Helminth Genomes Consortium., Coghlan, A., Tyagi, R. et al. (2019) Comparative  
957 genomics of the major parasitic worms. *Nat Genet* 51, 163–174. [https://doi.org/10.1038/s41588-](https://doi.org/10.1038/s41588-018-0262-1)  
958 018-0262-1

- 959  
960 Ismail M, Metwally A, Farghaly A, Bruce J, Tao LF, Bennett JL (1996) Characterization of isolates  
961 of *Schistosoma mansoni* from Egyptian villagers that tolerate high doses of praziquantel. American  
962 Journal of Tropical Medicine and Hygiene. 1996;55:214–218  
963
- 964 Iwai S, Fukui Y, Fujiwara Y, Takeda M. (2006) Structure and expressions of two circadian clock  
965 genes, period and timeless in the commercial silkworm, *Bombyx mori*. J Insect Physiol. 52(6):625-  
966 37. doi: 10.1016/j.jinsphys.2006.03.001.  
967
- 968 Jud C, Schmutz I, Hampp G, Oster H, Albrecht U (2005) A guideline for analyzing circadian  
969 wheel-running behavior in rodents under different lighting conditions. *Biol. Proced. Online* 7:101–  
970 116. doi.org/10.1251/bpo109  
971
- 972 Kregel KC. (2002) Molecular biology of thermoregulation: invited review: Heat shock proteins:  
973 modifying factors in physiological stress responses and acquired thermotolerance. J. Appl. Physiol.  
974 92:2177–86.  
975
- 976 Kumar S, Stecher G, Li M, Knyaz C, Tamura K. (2018) MEGA X: molecular evolutionary genetics  
977 analysis across computing platforms. Mol Biol Evol.35(6):1547-9.  
978
- 979 Llanos JM, Epele de Vaccaro ME (1972) Circadian rhythm in blood glucose levels in normal and  
980 hepatectomized mice, Biological Rhythm Research, 3:1, 25-32, DOI:  
981 10.1080/09291017209359294  
982
- 983 Li H, Wang Z, Zhou X, Cheng Y, Xie Z, Manley JL, Feng Y. (2013) Far upstream element-binding  
984 protein 1 and RNA secondary structure both mediate second-step splicing repression. Proc Natl  
985 Acad Sci U S A.110(29):E2687-95. doi: 10.1073/pnas.1310607110.  
986
- 987 Li S, Shui K, Zhang Y, Lv Y, Deng W, Ullah S, Zhang L, Xue Y. CGDB: a database of circadian  
988 genes in eukaryotes. Nucleic Acids Res. 2017 Jan 4;45(D1):D397-D403. doi:  
989 10.1093/nar/gkw1028. PMID: 27789706; PMCID: PMC5210527.  
990
- 991 Liu W, Xie Y, Ma J, Luo X, Nie P, Zuo Z, Lahrmann U, Zhao Q, Zheng Y, Zhao Y, Xue Y, Ren J.  
992 (2015) IBS: an illustrator for the presentation and visualization of biological sequences.  
993 Bioinformatics. 31:3359-61. doi: 10.1093/bioinformatics/btv362.  
994
- 995 Love MI, Huber W, Anders S (2014) Moderated estimation of fold change and dispersion for RNA-  
996 seq data with DESeq2. Genome Biol 15(12):550. doi: 10.1186/s13059-014-0550-8.  
997
- 998 Luo W, Brouwer C. (2013) Pathview: an R/Bioconductor package for pathway-based data  
999 integration and visualization. Bioinformatics. 15;29(14):1830-1. doi:  
1000 10.1093/bioinformatics/btt285.  
1001
- 1002 Mahe D, Mahl P, Gattoni R, Fischer N, Mattei MG, et al. (1997) Cloning of human 2H9  
1003 heterogeneous nuclear ribonucleoproteins. Relation with splicing and early heat shock-induced  
1004 splicing arrest. J Biol Chem 272: 1827–1836.  
1005
- 1006 Maze I, Wenderski W, Noh KM, Bagot RC, Tzavaras N, Purushothaman I, Elsässer SJ, Yin G,  
1007 Ionete C, Hurd YL, Tamminga CA, Halene T, Farrelly L, Soshnev AA, Wen D, Rafii S, Birtwistle  
1008 MR, Akbarian S, Buchholz BA, Blitzler RD, Nestler EJ, Yuan ZF, Garcia BA, Shen L, Molina H,  
1009 Allis CD (2015) Critical Role of Histone Turnover in Neuronal Transcription and Plasticity. Neuron  
1010 87(1):77-94. doi: 10.1016/j.neuron.2015.06.014.

- 1011  
1012 Mebius MM, van Genderen PJJ, Urbanus RT, Tielens AGM, de Groot PG, van Hellemond JJ  
1013 (2013) Interference with the Host Haemostatic System by Schistosomes. PLoS Pathog 9(12):  
1014 e1003781. doi.org/10.1371/journal.ppat.1003781  
1015  
1016 Mendez D, Gaulton A, Bento AP, Chambers J, De Veij M, Félix E, Magariños MP, Mosquera JF,  
1017 Mutowo P, Nowotka M, Gordillo-Marañón M, Hunter F, Junco L, Mugumbate G, Rodriguez-Lopez  
1018 M, Atkinson F, Bosc N, Radoux CJ, Segura-Cabrera A, Hersey A, Leach AR. (2019) ChEMBL:  
1019 towards direct deposition of bioassay data. Nucleic Acids Res. Jan 8;47(D1):D930-D940. doi:  
1020 10.1093/nar/gky1075.  
1021  
1022 Mickum ML, Prasanphanich NS, Heimbürg-Molinario J, Leon KE, Cummings RD (2014)  
1023 Deciphering the glycogenome of schistosomes. Front. Genet. 5:262  
1024 doi.org/10.3389/fgene.2014.0026  
1025  
1026 Morais SB, Figueiredo BC, Assis NRG, Homan J, Mambelli FS, Bicalho RM, Souza C, Martins  
1027 VP, Pinheiro CS, Oliveira SC (2018) *Schistosoma mansoni* SmKI-1 or its c-terminal fragment  
1028 induces partial protection against *S. mansoni* infection in Mice. Front Immunol. 9: 1762.  
1029 doi:10.3389/fimmu.2018.01762  
1030  
1031 Mouahid G, Idris MA, Verneau O, Théron A, Shaban MMA, Moné H (2012) A new chronotype of  
1032 *Schistosoma mansoni*: adaptive significance. Tropical Medicine and International Health. 17:727-  
1033 732  
1034  
1035 Nagahama M, Hara Y, Seki A, Yamazoe T, Kawate Y, Shinohara T, Hatsuzawa K, Tani K, Tagaya  
1036 M. (2004) NVL2 is a nucleolar AAA-ATPase that interacts with ribosomal protein L5 through its  
1037 nucleolar localization sequence. Mol Biol Cell. 15(12):5712-23. doi: 10.1091/mbc.e04-08-0692.  
1038  
1039 O'Donnell AJ, Schneider P, McWatters HG, Reece SE (2011) Fitness costs of disrupting circadian  
1040 rhythms in malaria parasites Proc. R. Soc. B.278 2429–2436  
1041 <https://doi.org/10.1098/rspb.2010.2457>  
1042  
1043 Olmedo M, O'Neill JS, Edgar RS, Valekunja UK, Reddy AB, Merrow M. (2012) Circadian  
1044 regulation of olfaction and an evolutionarily conserved, nontranscriptional marker in  
1045 *Caenorhabditis elegans*. Proc Natl Acad Sci U S A.109(50):20479-84. doi:  
1046 10.1073/pnas.1211705109.  
1047  
1048 Padalino G, Ferla S, Brancale A, Chalmers IW, Hoffmann KF (2018) Combining bioinformatics,  
1049 cheminformatics, functional genomics and whole organism approaches for identifying epigenetic  
1050 drug targets in *Schistosoma mansoni*, International Journal for Parasitology: Drugs and Drug  
1051 Resistance. 8:559-570. doi.org/10.1016/j.ijpddr.2018.10.005.  
1052  
1053 Perrigault M, Tran D. (2017) Identification of the Molecular Clockwork of the Oyster *Crassostrea*  
1054 *gigas*. PLoS One. 12(1):e0169790. doi: 10.1371/journal.pone.0169790.  
1055  
1056 Preußner M, Goldammer G, Neumann A, Haltenhof T, Rautenstrauch P, Müller-McNicoll M, Heyd  
1057 F. (2017) Body Temperature Cycles Control Rhythmic Alternative Splicing in Mammals. Mol Cell.  
1058 67(3):433-446.e4. doi: 10.1016/j.molcel.2017.06.006.  
1059  
1060 Rampelt H, Kirstein-Miles J, Nillegoda NB, Chi K, Scholz SR, Morimoto RI, Bukau B. (2012).  
1061 Metazoan Hsp70 machines use Hsp110 to power protein disaggregation. EMBO J. 31, 4221–4235.  
1062 (10.1038/emboj.2012.264)

1063

1064 Ranasinghe SL, Fischer K, Gobert GN, McManus DP (2015) Functional expression of a novel  
1065 Kunitz type protease inhibitor from the human blood fluke *Schistosoma mansoni*. *Parasites &*  
1066 *Vectors* 8: 408 doi.org/10.1186/s13071-015-1022-z

1067

1068 Reece SE, Prior KF, Mideo N (2017) The life and times of parasites: rhythms in strategies for  
1069 within-host survival and between-host transmission. *Journal of Biological Rhythms*, 32(6):516-33.  
1070 <https://doi.org/10.1177%2F0748730417718904>

1071

1072 Reinke H, Saini C, Fleury-Olela F, Dibner C, Benjamin IJ, Schibler U. (2008) Differential display  
1073 of DNA-binding proteins reveals heat-shock factor 1 as a circadian transcription factor. *Genes Dev.*  
1074 22(3):331-45. doi: 10.1101/gad.453808.

1075

1076 Reitzel AM, Behrendt L, Tarrant AM. (2010) Light entrained rhythmic gene expression in the sea  
1077 anemone *Nematostella vectensis*: the evolution of the animal circadian clock. *PLoS One.*  
1078 5(9):e12805. doi: 10.1371/journal.pone.0012805.

1079

1080 Rijo-Ferreira F, Pinto-Neves D, Barbosa-Morais NL, Takahashi JS, Figueiredo LM (2017)  
1081 *Trypanosoma brucei* metabolism is under circadian control. *Nat. Microbiol.* 2, 17032.

1082

1083 Rijo-Ferreira F, Acosta-Rodriguez VA, Abel JH, Kornblum I, Bento I, Kilaru G, Klerman EB,  
1084 Mota MM, Takahashi JS (2020) The malaria parasite has an intrinsic clock *Science* 368, 746-753  
1085 DOI: 10.1126/science.aba2658

1086

1087 Robinson MD, McCarthy DJ, Smyth GK (2010) edgeR: a Bioconductor package for differential  
1088 expression analysis of digital gene expression data. *Bioinformatics*;26(1):139-40. doi:  
1089 10.1093/bioinformatics/btp616

1090

1091 Rund SSC, Yoo B, Alam C, Green T, Stephens MT, Zeng E, George GF, Sheppard AD, Duffield  
1092 GE, Milenković T, Pfrender ME (2016). Genome-wide profiling of 24 hr diel rhythmicity in the  
1093 water flea, *Daphnia pulex*: network analysis reveals rhythmic gene expression and enhances  
1094 functional gene annotation. *BMC Genomics* 17, 653 (2016). [https://doi.org/10.1186/s12864-016-](https://doi.org/10.1186/s12864-016-2998-2)  
1095 [2998-2](https://doi.org/10.1186/s12864-016-2998-2)

1096

1097 Scheiermann C, Kunisaki Y, Lucas D, Chow A, Jang JE, Zhang D, Hashimoto D, Merad M,  
1098 Frenette PS (2012) Adrenergic nerves govern circadian leukocyte recruitment to tissues. *Immunity*  
1099 37:290–301 doi.org/10.1016/j.immuni.2012.05.021

1100

1101 Schnytzer Y, Simon-Blecher N, Li J, Waldman Ben-Asher H, Salmon-Divon M,  
1102 Achituv Y, Hughes ME, Levy O (2018) Tidal and diel orchestration of behaviour and gene  
1103 expression in an intertidal mollusc. *Scientific Reports* 8: 4917

1104

1105 Shin, C., Feng, Y. & Manley, J. (2004) Dephosphorylated SRp38 acts as a splicing repressor in  
1106 response to heat shock. *Nature* 427, 553–558. doi.org/10.1038/nature02288

1107

1108 Sievers F, Wilm A, Dineen D, Gibson TJ, Karplus K, Li W, Lopez R, McWilliam H, Remmert M,  
1109 Söding J, Thompson JD, Higgins DG. (2011) Fast, scalable generation of high-quality protein  
1110 multiple sequence alignments using Clustal Omega. *Mol Syst Biol.* 7:539. doi:  
1111 10.1038/msb.2011.75.

1112

1113 Skelly PJ, Da'dara AA, Li X-H, Castro-Borges W, Wilson RA (2014) Schistosome feeding and  
1114 regurgitation. *PLoS Pathog* 10(8): e1004246. doi.org/10.1371/journal.ppat.1004246



- 1115  
1116 Skinner DE, Rinaldi G, Suttiprapa S, Mann VH, Smircich P, Cogswell AA, Williams DL, Brindley  
1117 PJ. Vasa-Like DEAD-Box RNA Helicases of *Schistosoma mansoni*. PLoS Negl Trop Dis.  
1118 2012;6(6):e1686. doi: 10.1371/journal.pntd.0001686.  
1119
- 1120 Smit CH, van Diepen A, Nguyen DL, Wuhrer M, Hoffmann KF, Deelder AM, Hokke CH (2015)  
1121 Glycomic analysis of life stages of the human parasite *Schistosoma mansoni* reveals developmental  
1122 expression profiles of functional and antigenic glycan motifs. Molecular & Cellular Proteomics 14,  
1123 7: 1750-1769. doi.org/10.1074/mcp.M115.048280.  
1124
- 1125 Sonoda J, Mehl IR, Chong LW, Nofsinger RR, Evans RM. PGC-1beta controls mitochondrial  
1126 metabolism to modulate circadian activity, adaptive thermogenesis, and hepatic steatosis. Proc Natl  
1127 Acad Sci U S A. 2007;104:5223–5228.  
1128
- 1129 Stice, J.P., Knowlton, A.A. Estrogen, NFκB, and the heat shock response. *Mol Med* 14, 517–527  
1130 (2008). <https://doi.org/10.2119/2008-00026>.  
1131
- 1132 Stuart T, Butler A, Hoffman P, Hafemeister C, Papalexi E, Mauck WM, Hao Y, Stoeckius M,  
1133 Smibert P, Satija R (2019) Comprehensive integration of single-cell data. *Cell*;177(7):1888-  
1134 1902.e21.doi: 10.1016/j.cell.2019.05.031.  
1135
- 1136 Szklarczyk D, Gable AL, Lyon D, Junge A, Wyder S, Huerta-Cepas J, Simonovic M, Doncheva  
1137 NT, Morris JH, Bork P, Jensen LJ, von Mering C (2019) STRING v11: protein–protein association  
1138 networks with increased coverage, supporting functional discovery in genome-wide experimental  
1139 datasets, *Nucleic Acids Research*. 47:607–613, <https://doi.org/10.1093/nar/gky1131>  
1140
- 1141 Takahashi J (2017) Transcriptional architecture of the mammalian circadian clock. *Nat Rev Genet*  
1142 18, 164–179. <https://doi.org/10.1038/nrg.2016.150>  
1143
- 1144 Tissières A, Mitchell HK, Tracy UM. (1974) Protein synthesis in salivary glands of *Drosophila*  
1145 *melanogaster*: relation to chromosome puffs. *J Mol Biol*. 84(3):389-98. doi: 10.1016/0022-  
1146 2836(74)90447-1.  
1147
- 1148 Tsoumtsa LL, Torre C, Trouplin V, Coiffard B, Gimenez G, Mege JL, Ghigo E. Antimicrobial  
1149 capacity of the freshwater planarians against *S. aureus* is under the control of Timeless. *Virulence*.  
1150 2017 Oct 3;8(7):1160-9.  
1151
- 1152 Vogel JL, Parsell DA, Lindquist S. (1995) Heat-shock proteins Hsp104 and Hsp70 reactivate  
1153 mRNA splicing after heat inactivation. *Curr Biol*. 5(3):306-17. doi: 10.1016/s0960-9822(95)00061-  
1154 3.  
1155
- 1156 Wang B, Lee J, Li P, Saberi A, Yang H, Liu C, Zhao M, Newmark PA(2018) Stem cell  
1157 heterogeneity drives the parasitic life cycle of *Schistosoma mansoni*. *eLife* 2018;7:e35449 DOI:  
1158 10.7554/eLife.35449  
1159
- 1160 Wang J, Chen R, Collins JJ III (2019) Systematically improved *in vitro* culture conditions reveal  
1161 new insights into the reproductive biology of the human parasite *Schistosoma mansoni*. *PLoS Biol*  
1162 17(5): e3000254. doi.org/10.1371/journal.pbio.3000254
- 1163 Wang J, Paz C, Padalino G, Coghlan A, Lu Z, Gradinaru I, Collins JNR, Berriman M, Hoffmann  
1164 KF, Collins JJ III (2020) Large-scale RNAi screening uncovers therapeutic targets in the parasite  
1165 *Schistosoma mansoni*. *Science* 369:1649-1653. DOI: 10.1126/science.abb7699

- 1166 Waterhouse AM, Procter JB, Martin DM, Clamp M, Barton GJ. (2009) Jalview Version 2—a  
1167 multiple sequence alignment editor and analysis workbench. *Bioinformatics*.25(9):1189-91.  
1168
- 1169 Wen S, Ma D, Zhao M, Xie L, Wu Q, Gou L, Zhu C, Fan Y, Wang H, Yan J. (2020)  
1170 Spatiotemporal single-cell analysis of gene expression in the mouse suprachiasmatic nucleus. *Nat*  
1171 *Neurosci*. 23(3):456-467. doi: 10.1038/s41593-020-0586-x.  
1172
- 1173 Wendt G, Zhao L, Chen R, Liu C, O'Donoghue AJ, Caffrey CR, Reese ML, Collins JJ III (2020) A  
1174 single-cell RNA-seq atlas of *Schistosoma mansoni* identifies a key regulator of blood feeding.  
1175 *Science* 369, 1644–1649. DOI: 10.1126/science.abb7709  
1176
- 1177 Westwood ML, O'Donnell AJ, de Bekker C, Lively CM, Zuk M, Reece SE (2019) The  
1178 evolutionary ecology of circadian rhythms in infection. *Nat Ecol Evol* 3, 552–560.  
1179 <https://doi.org/10.1038/s41559-019-0831-4>  
1180
- 1181 Whitmore D, Foulkes NS, Strähle U, Sassone-Corsi P (1998) Zebrafish Clock rhythmic expression  
1182 reveals independent peripheral circadian oscillators. *Nat Neurosci*. 1998 Dec;1(8):701-7. doi:  
1183 10.1038/3703.  
1184
- 1185 Wu G, Anafi RC, Hughes ME, Kornacker K, Hogenesch JB (2016) MetaCycle: an integrated R  
1186 package to evaluate periodicity in large scale data *Bioinformatics* 32(21):3351-3353. doi:  
1187 10.1093/bioinformatics/btw405.  
1188
- 1189 Xu F, Kula-Eversole E, Iwanaszko M, Hutchison AL, Dinner A, Allada R (2019) Circadian Clocks  
1190 Function in Concert with Heat Shock Organizing Protein to Modulate Mutant Huntingtin  
1191 Aggregation and Toxicity, *Cell Reports*, 27, 59-70.e4, <https://doi.org/10.1016/j.celrep.2019.03.015>.  
1192
- 1193 Yang J, Zhang Y (2015) I-TASSER server: new development for protein structure and function  
1194 predictions. *Nucleic Acids Research*, 43: W174-W181  
1195
- 1196 You H, Gobert GN, Duke MG, Zhang W, Li Y, Jones MK, McManus DP (2012) The insulin  
1197 receptor is a transmission blocking veterinary vaccine target for zoonotic *Schistosoma japonicum*.  
1198 *International Journal for Parasitology* 42;801-807 doi.org/10.1016/j.ijpara.2012.06.002  
1199
- 1200 You H, Gobert GN, Cai P, Mou R, Nawaratna S, Fang G, Villinger F, McManus DP (2015)  
1201 Suppression of the insulin receptors in adult *Schistosoma japonicum* impacts on parasite growth and  
1202 development: further evidence of vaccine potential. *PLoS Negl Trop Dis* 9(5): e0003730.  
1203 <https://doi.org/10.1371/journal.pntd.0003730>  
1204
- 1205 Zantke J, Ishikawa-Fujiwara T, Arboleda E, Lohs C, Schipany K, Hallay N, Straw AD, Todo T,  
1206 Tessmar-Raible K. (2013) Circadian and circalunar clock interactions in a marine annelid. *Cell Rep*.  
1207 5(1):99-113. doi: 10.1016/j.celrep.2013.08.031.  
1208
- 1209 Zhang R, Lahens NF, Balance HI, Hugher ME, Hogenesch JB (2014) A circadian gene expression  
1210 atlas in mammals: implications for biology and medicine. *PNAS* 111:16219-16224.  
1211 doi.org/10.1073/pnas.1408886111  
1212
- 1213 Zheng X, Sehgal A. (2008) Probing the relative importance of molecular oscillations in the  
1214 circadian clock. *Genetics*. 178(3):1147-55. doi: 10.1534/genetics.107.088658.  
1215

1216 Zhu H, Sauman I, Yuan Q, Casselman A, Emery-Le M, Emery P, Reppert SM (2008)  
 1217 Cryptochromes define a novel circadian clock mechanism in monarch butterflies that may underlie  
 1218 sun compass navigation. PLoS Biol. 6(1):e4. doi: 10.1371/journal.pbio.0060004.

1219  
 1220  
 1221  
 1222  
 1223  
 1224  
 1225

**Supplementary figures**

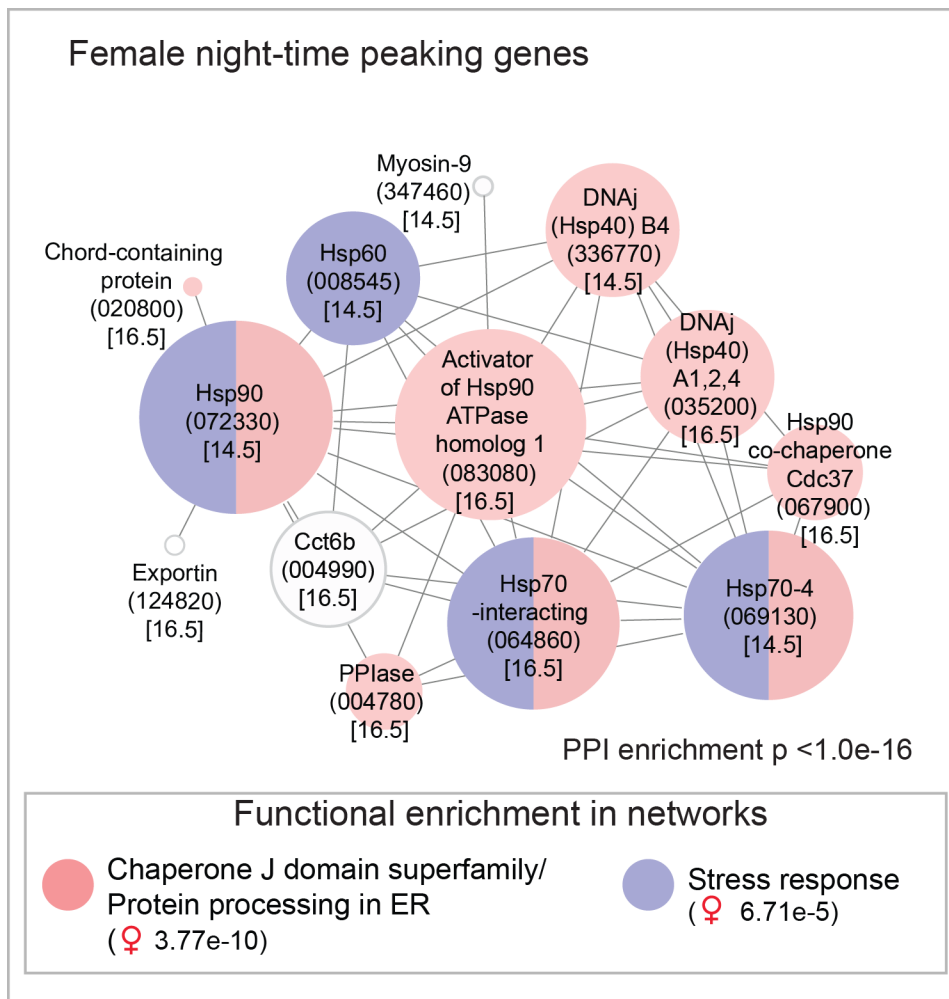

1226  
 1227  
 1228  
 1229  
 1230  
 1231  
 1232  
 1233  
 1234  
 1235  
 1236  
 1237  
 1238  
 1239  
 1240  
 1241

**Supplementary figure 1.** Predicted molecular interaction networks of night-time peaking genes in female *Schistosoma mansoni* (computed using the STRING online database). Node size reflects the number of connections a molecule has within the network. Lines (edges) connecting nodes are based on evidence of the function of homologues. Functional enrichment (FDR) as provided by STRING. (PPI= predicted protein interaction; geneIDs with Smp\_ prefixes removed; acrophase in brackets).

1242  
1243  
1244  
1245

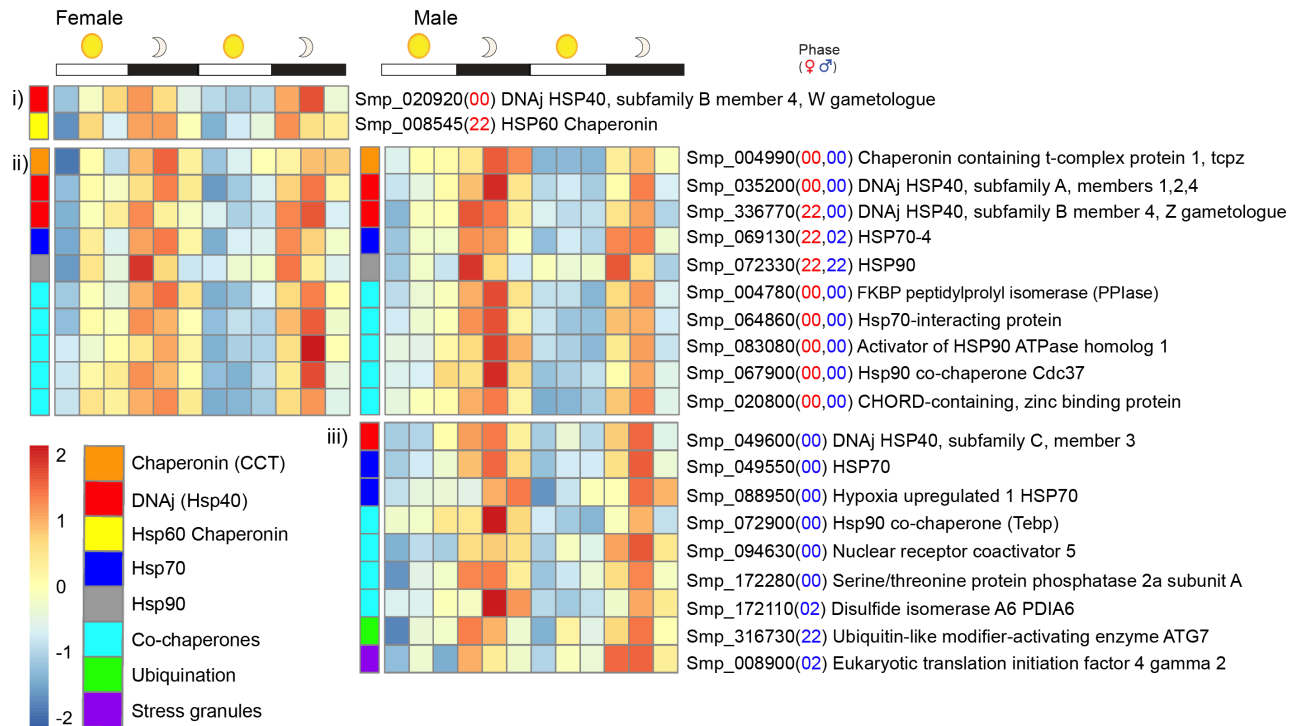

1246  
1247  
1248  
1249  
1250  
1251  
1252  
1253  
1254  
1255  
1256  
1257  
1258  
1259  
1260  
1261  
1262  
1263  
1264  
1265  
1266  
1267  
1268  
1269  
1270  
1271  
1272  
1273  
1274

**Supplementary figure 2.** Diel genes encoding heat shock proteins, co-chaperones and other proteins involved in heat shock response and recovery. All reach their acrophase between 22:00-02:00 hours but some show diel expression in one sex only (i & iii), whereas another ten cycle in both sexes, with eight in phase (ii).

1275  
1276  
1277  
1278

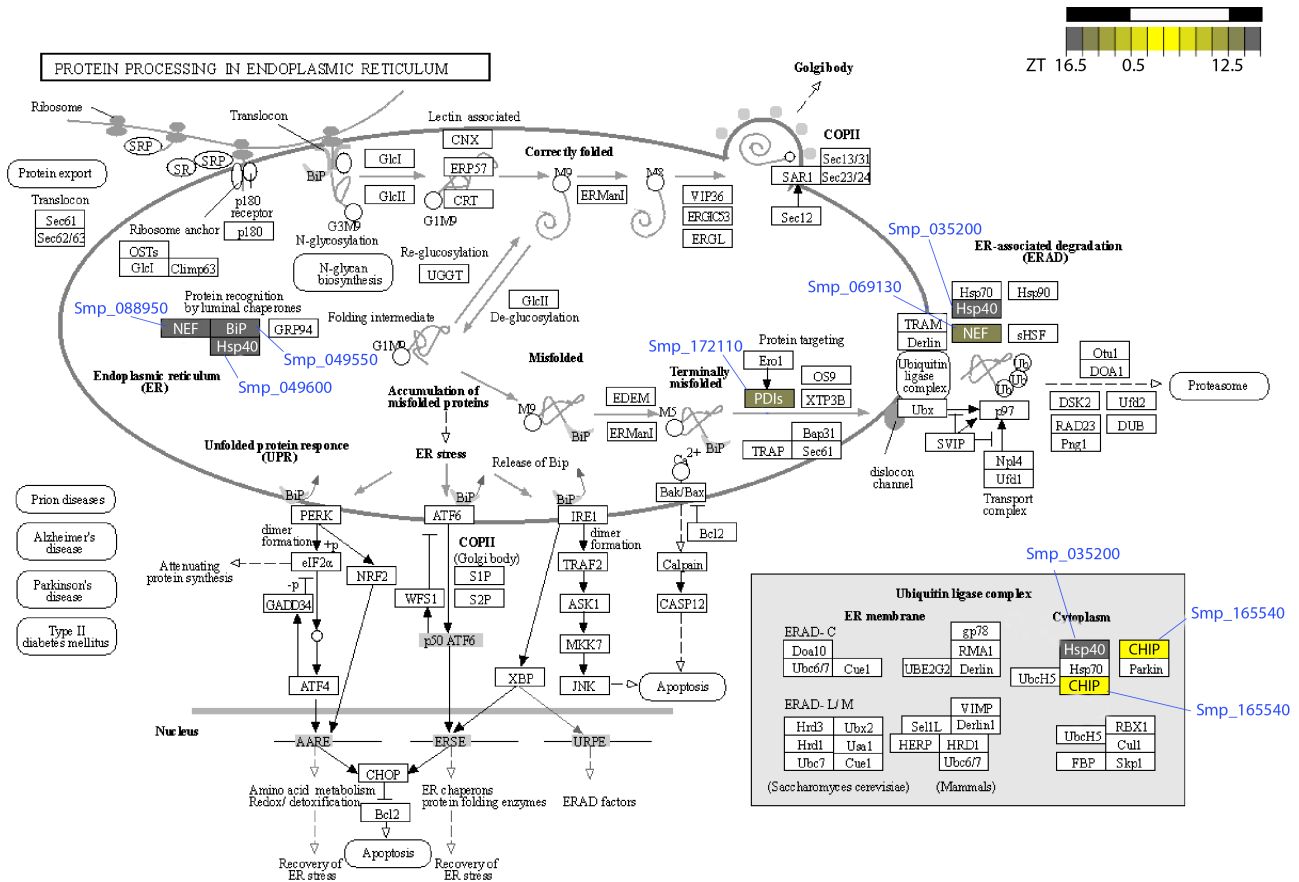

1279  
1280  
1281  
1282  
1283  
1284  
1285  
1286  
1287  
1288  
1289  
1290  
1291  
1292  
1293  
1294  
1295  
1296  
1297  
1298  
1299  
1300  
1301  
1302  
1303

**Supplementary figure 3.** The KEGG pathway ‘Protein processing in endoplasmic reticulum’ includes seven diel genes that encode heat shock proteins and other co-chaperones. Data on KEGG graph rendered by Pathview.

1304  
1305  
1306  
1307  
1308

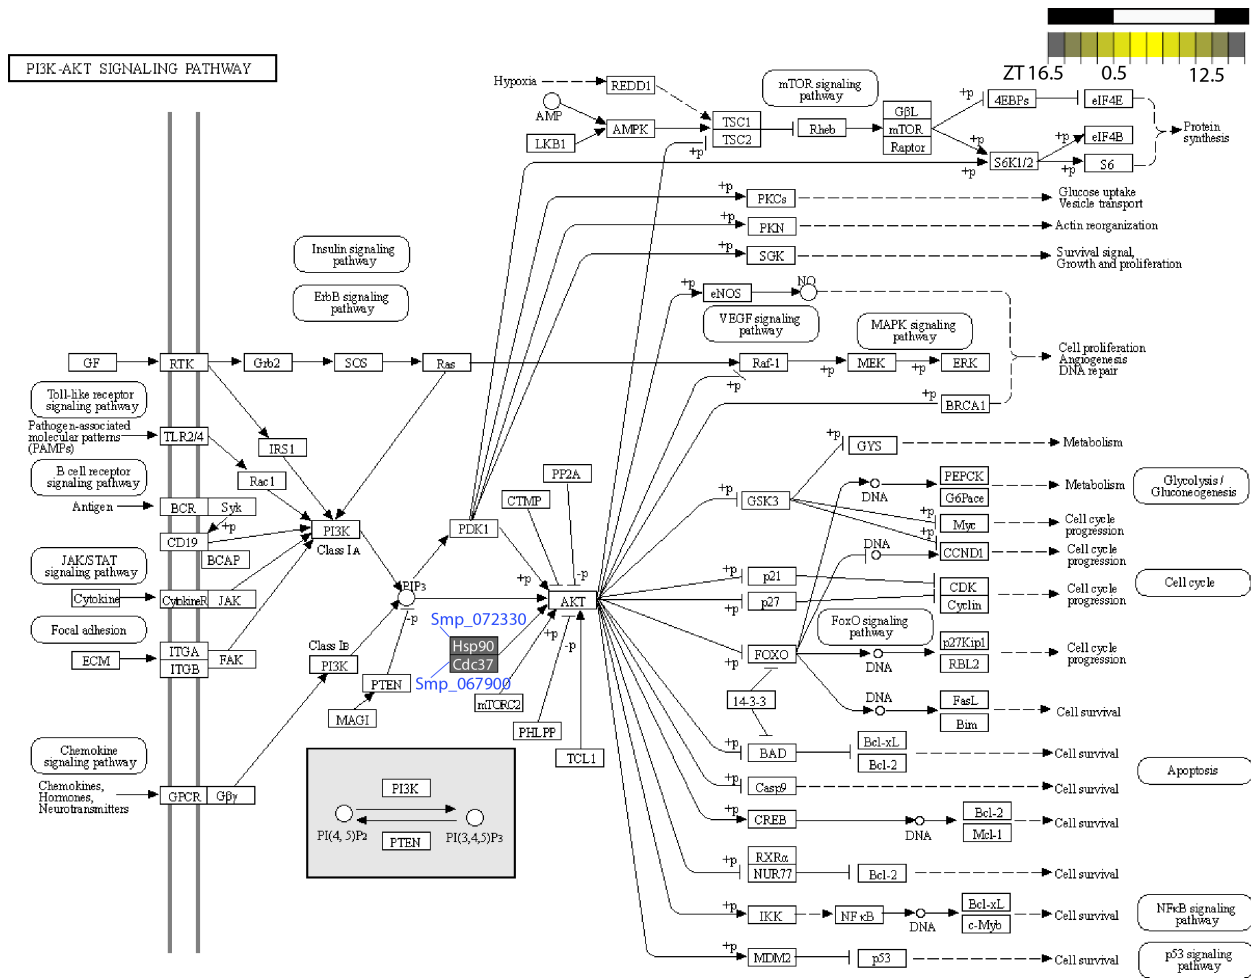

1309  
1310  
1311  
1312  
1313  
1314  
1315  
1316  
1317  
1318  
1319  
1320  
1321  
1322  
1323  
1324  
1325  
1326  
1327  
1328

**Supplementary figure 4.** The KEGG pathway ‘PI3K-AKT signaling pathway’ includes two diel genes; one that encodes heat shock protein 90 (HSP90) and the other encodes one of its co-chaperones, cell division cycle 37 (Cdc37). Data on KEGG graph rendered by Pathview.

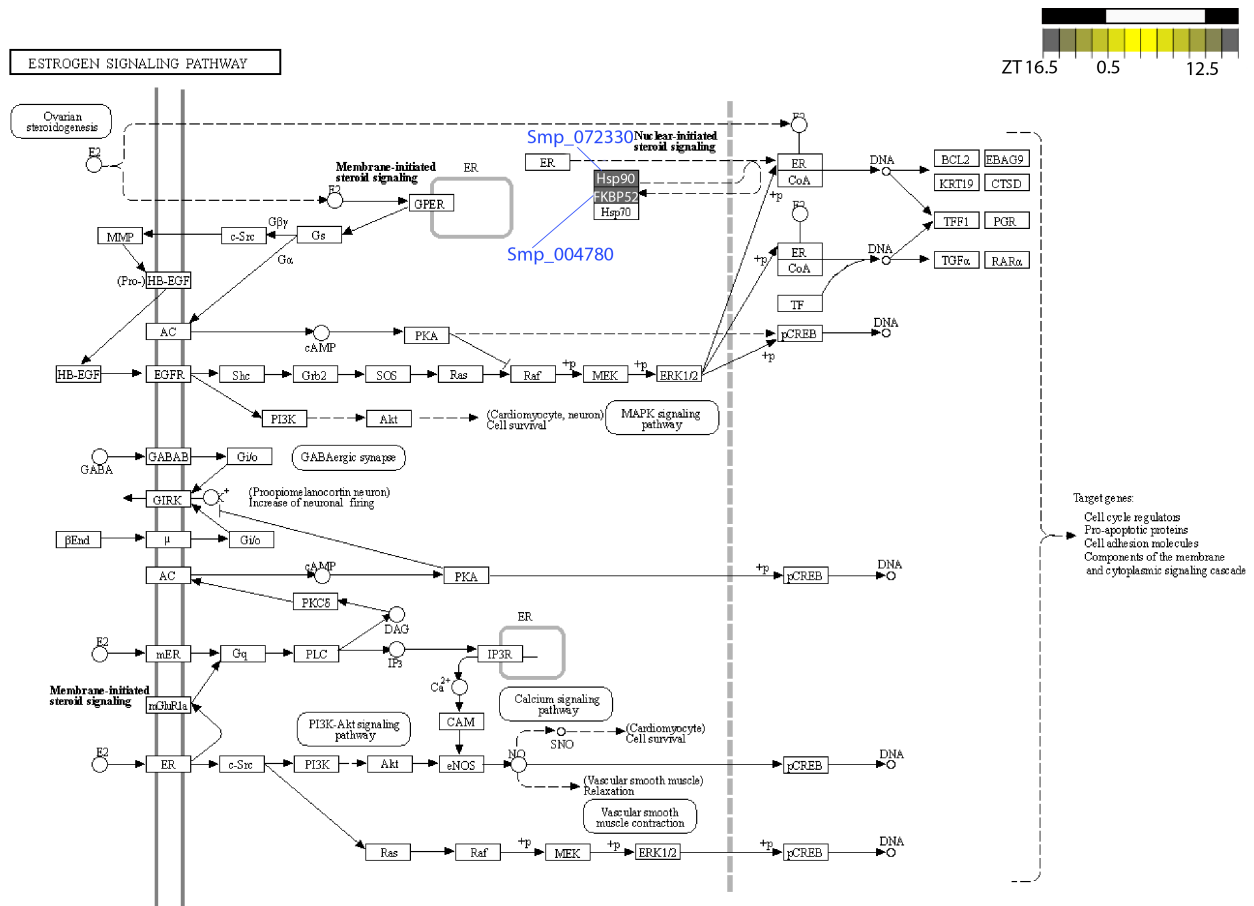

1329  
1330  
1331  
1332  
1333  
1334  
1335  
1336  
1337  
1338  
1339  
1340  
1341  
1342  
1343  
1344  
1345  
1346  
1347

**Supplementary figure 5.** The KEGG pathway ‘Estrogen signaling pathway’ includes two diel genes; one that encodes heat shock protein 90 (HSP90) and the other encodes one of its co-chaperones, immunophilin (FKBP52). However, HSP70 (Smp\_303420), another binding partner, does not cycle in male or female worms. Data on KEGG graph rendered by Pathview.

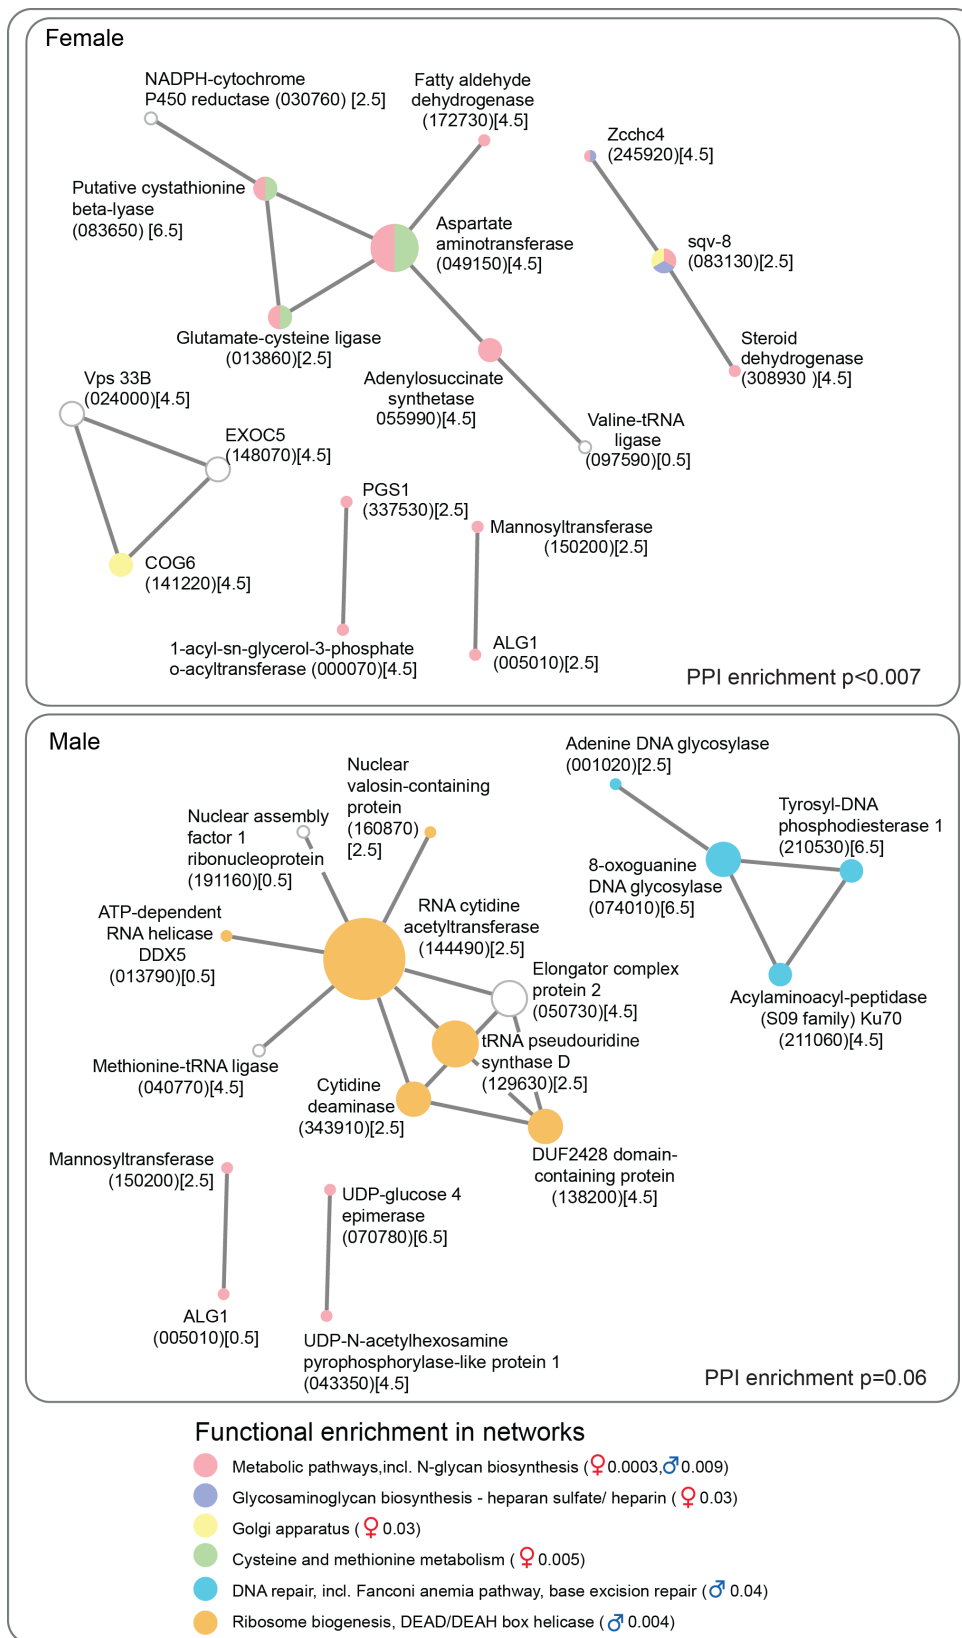

1348  
1349  
1350  
1351  
1352  
1353  
1354  
1355  
1356

**Supplementary figure 6.** Predicted molecular interaction networks of day-time peaking genes in female and male *Schistosoma mansoni* (computed using the STRING online database). Node size reflects the number of connections a molecule has within the network. Lines (edges) connecting nodes are based on evidence of the function of homologues. Functional enrichment (FDR) as provided by STRING. (PPI= predicted protein interaction; “Smp\_” prefixes have been removed from gene identifiers for clarity; acrophase in brackets).



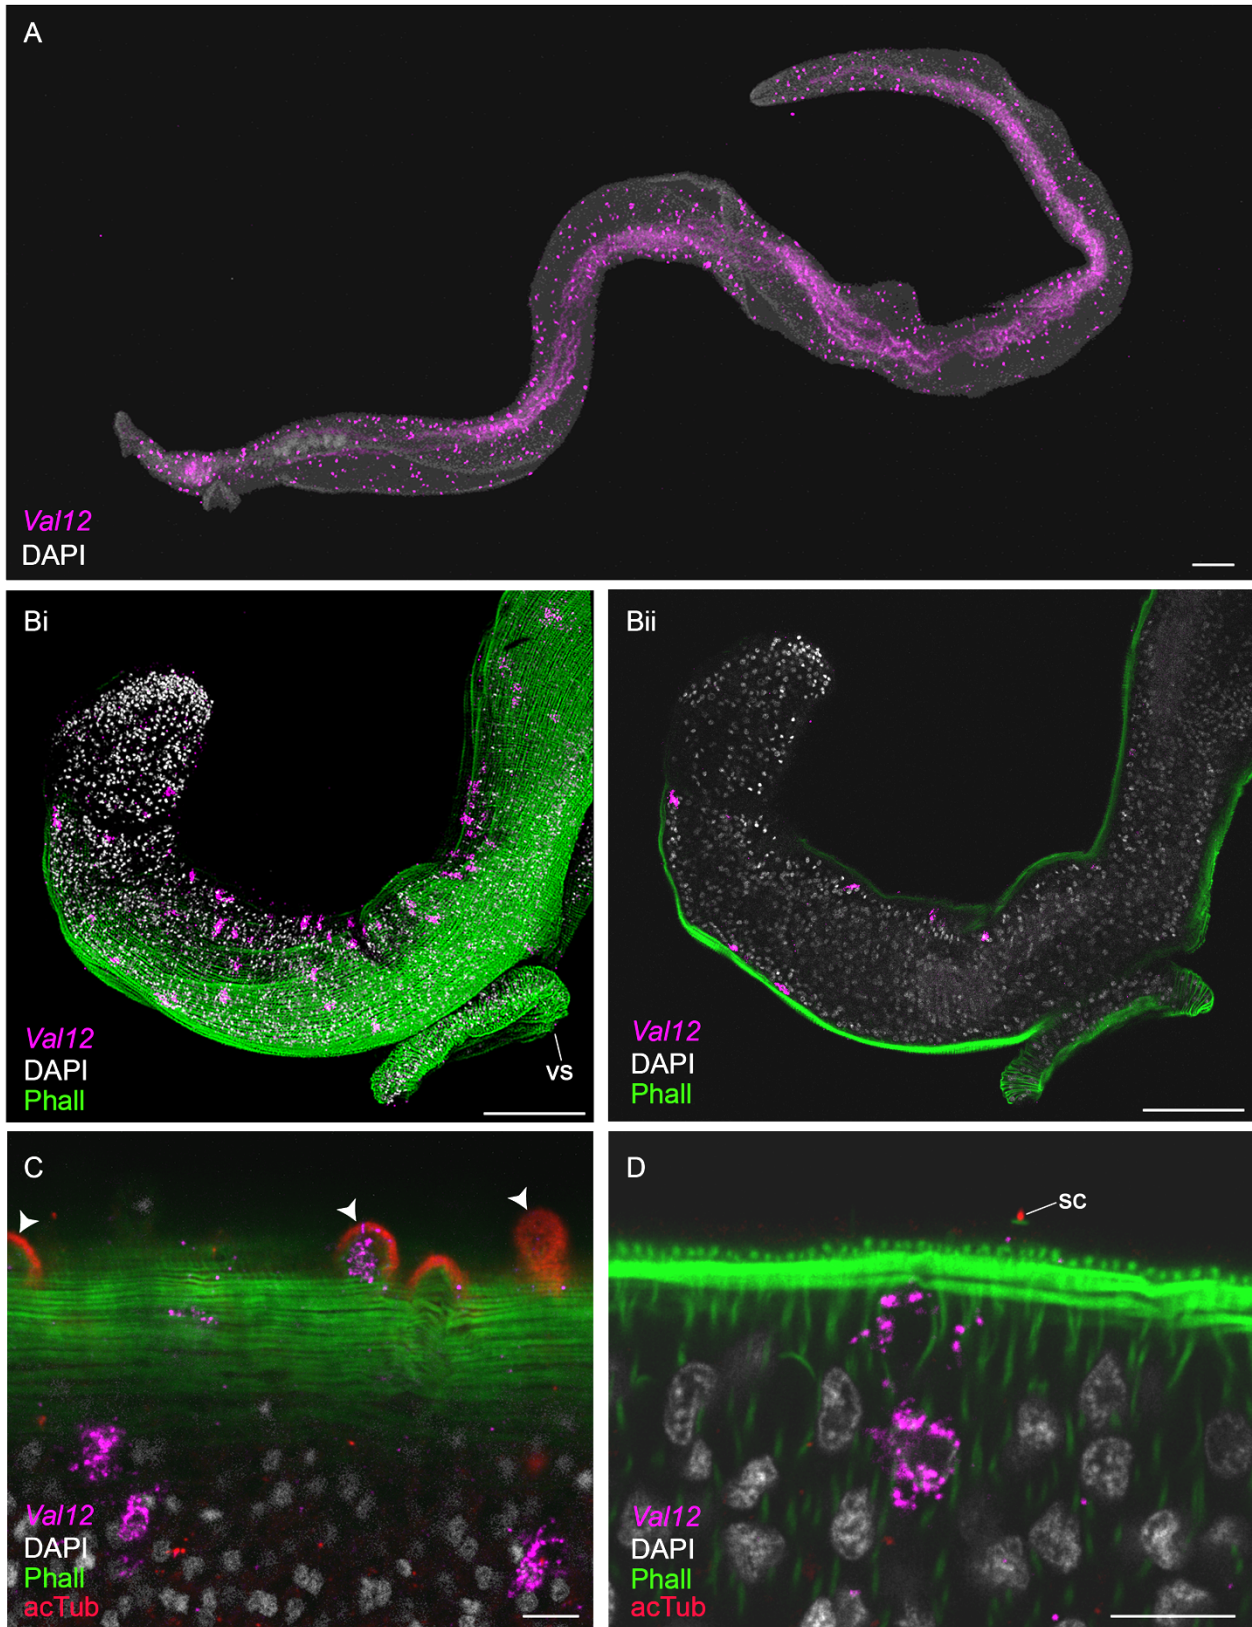

1357  
1358 **Supplementary figure 7.** In male worms *Venom allergen-like 12* (*Val12*, Smp\_123540) transcripts  
1359 peak in abundance at midday (ZT 4.5) and are expressed in **A**) ~ 500 cells that are distributed the  
1360 length of the body (anterior to left)(scale = 200 $\mu$ m). **B**) The *Val12*<sup>+</sup> cells sit below the body wall  
1361 musculature (phall = phalloidin) on both the ventral and dorsal sides, **i**) 3D projection and **ii**) optical  
1362 section of the head (scale = 100 $\mu$ m). **C&D**) *Val12* is expressed in some tubercles (arrowhead) of the  
1363 dorsal tegument, as well as directly under the body wall musculature (scale = 10 $\mu$ m)(optical

1364  
1365

sections)(acTub = acetylated tubulin).vs = ventral sucker, sc = sensory cilia. 100% of individuals examined, n = 20.

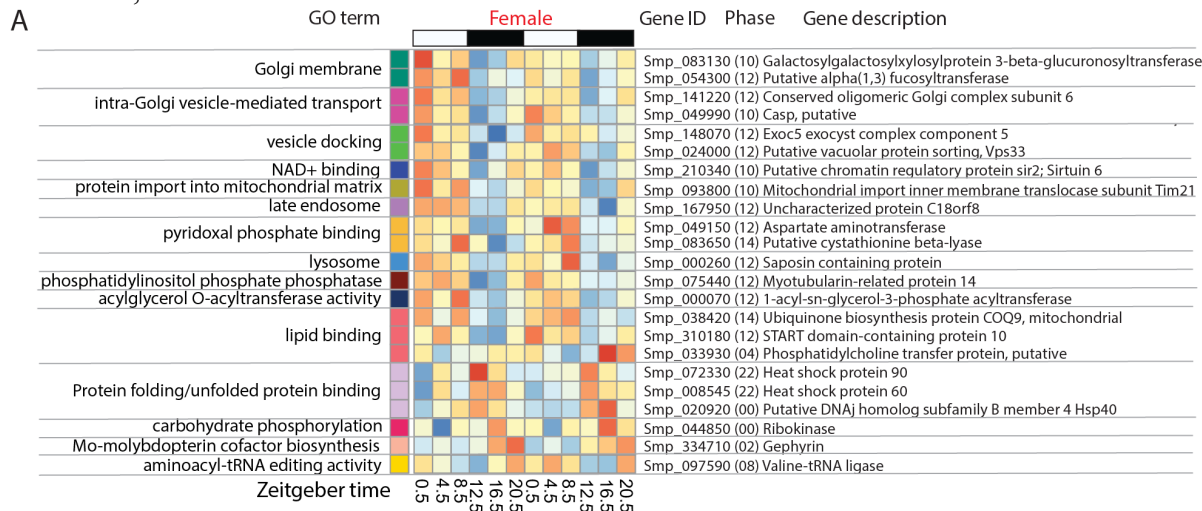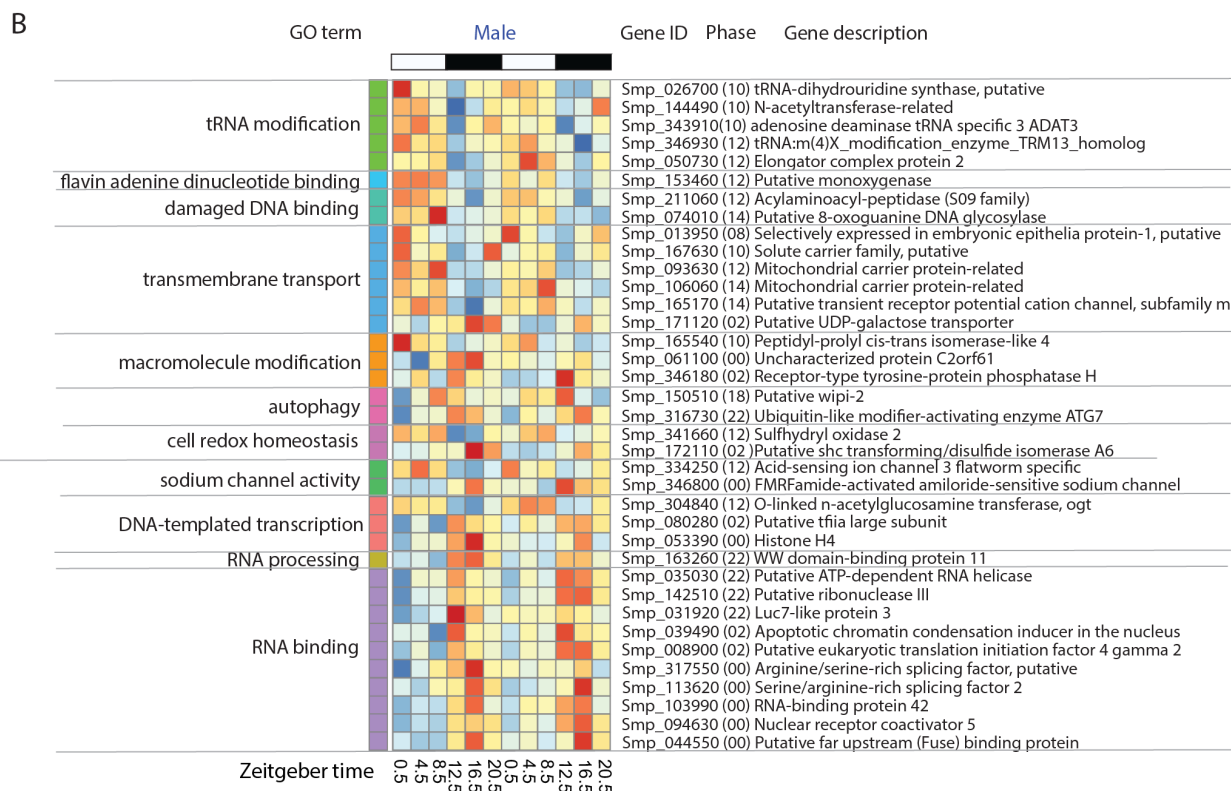

1366  
1367  
1368  
1369  
1370  
1371  
1372  
1373  
1374  
1375  
1376

**Supplementary figure 8. Sex-specific 24-hour rhythmic processes. Heatmaps showing GO terms enriched in diel genes that cycle in females (A) or males (B) only.**

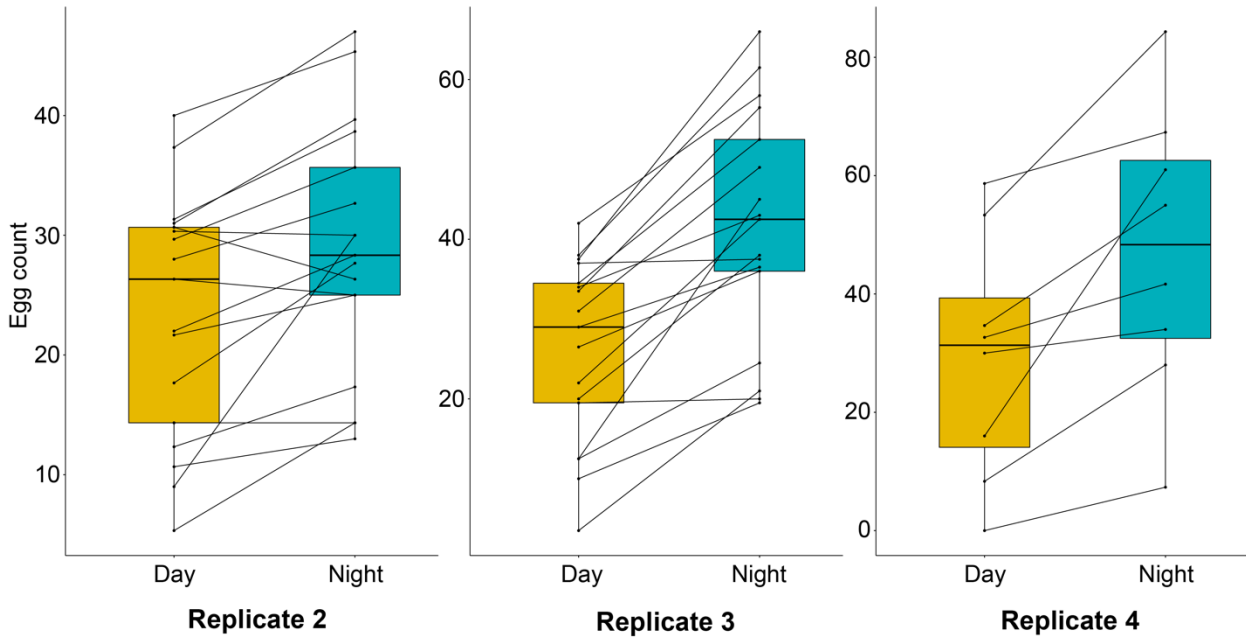

1377  
1378  
1379  
1380  
1381  
1382  
1383  
1384  
1385  
1386

**Supplementary figure 9.** Independent biological replicates of day and night egg counts from paired female worms *in vitro* (median and interquartile ranges). Replicate 2: n=17, paired Wilcoxon test P=0.002, median(night-day)=5.3. Replicate 3: n=17, P=0.0003, median(night-day)=17.5. Replicate 4: n=8, P=0.008, median(night-day)=14.3.

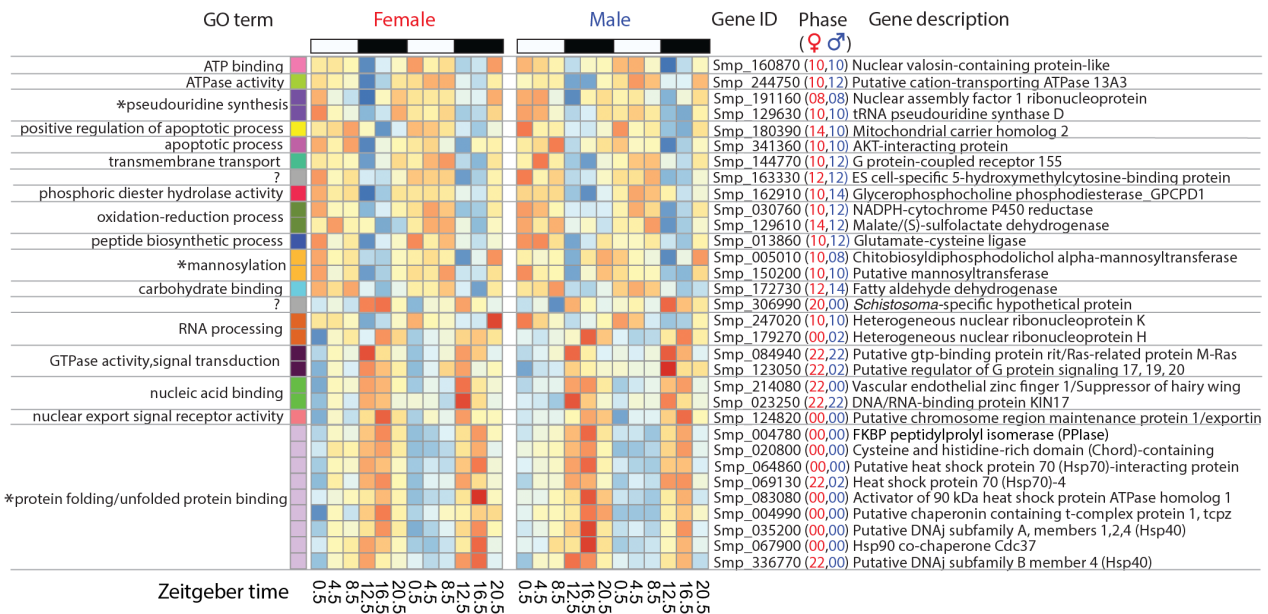

1387  
1388  
1389  
1390  
1391  
1392  
1393  
1394  
1395

**Supplementary figure 10.** Diel genes common to female and male worms show identical, or similar, phases suggesting that many biological processes and molecular functions (GO terms) are happening in synchrony. Most enriched functions are time-of-day specific; e.g. mannosylation, redox homeostasis and apoptosis occur during the daytime, whereas genes involved in molecular chaperoning, nucleic acid binding and signal transduction reach their acrophase at night. (\* significantly enriched GO terms FDR<0.01, **supplementary table 5**).

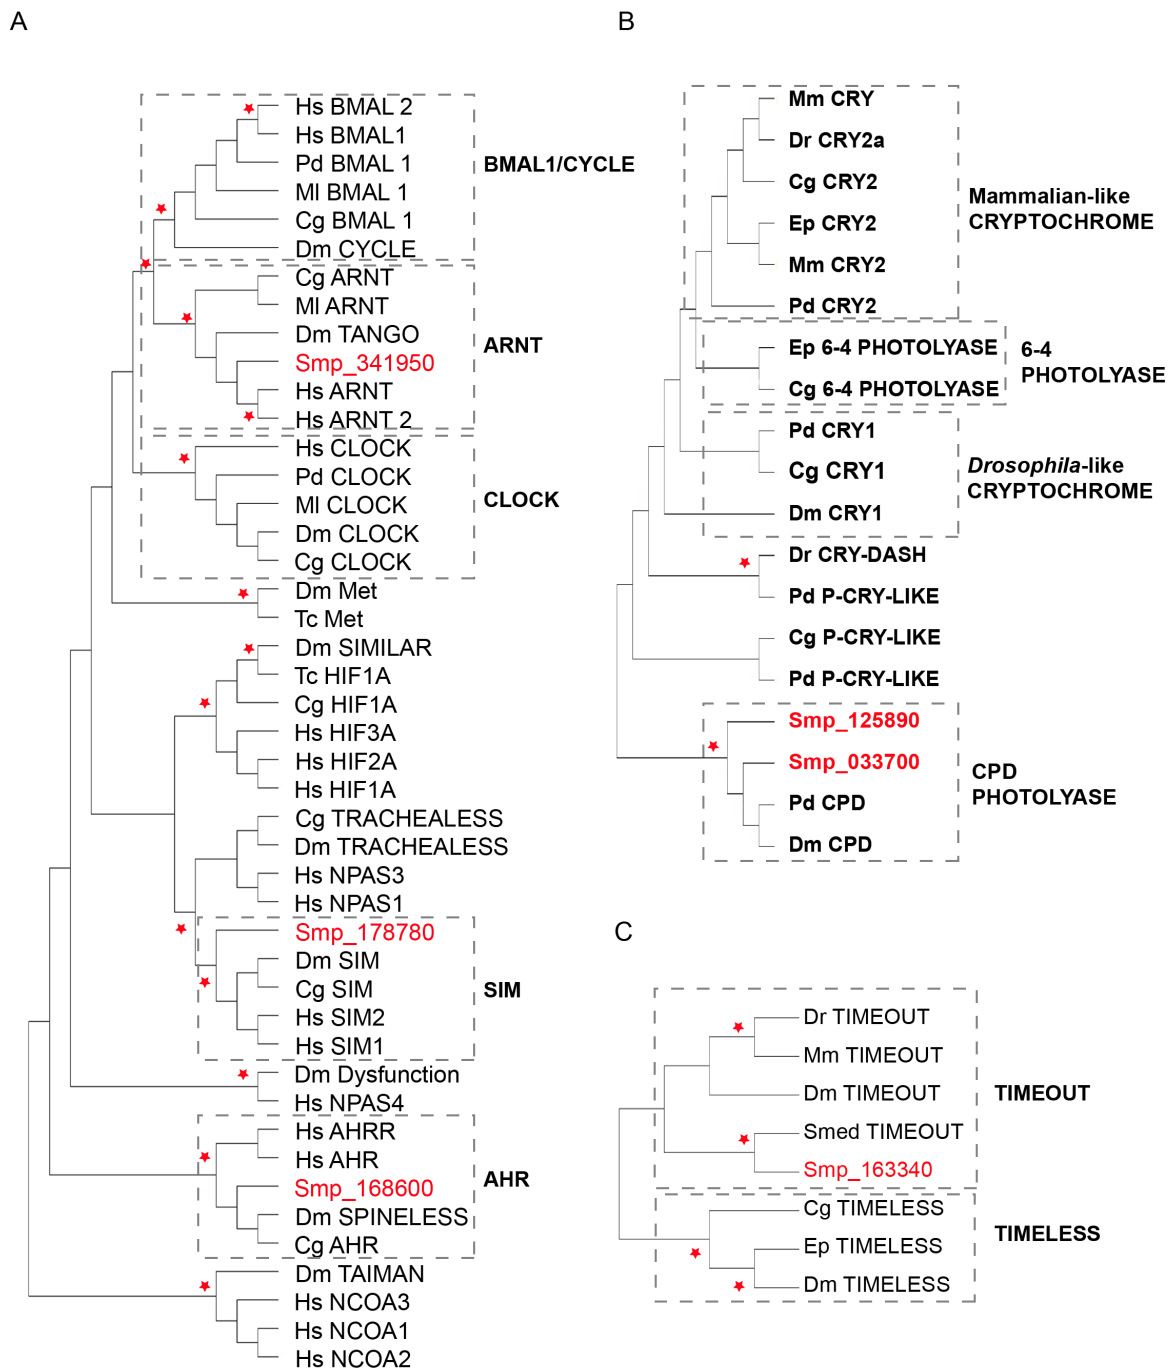

**Supplementary figure 11. Core circadian clock gene homologs are missing in *Schistosoma mansoni*.** Neighbour-joining phylogenetic trees were constructed in Mega-X with 1000 bootstrap replications and partial/pairwise deletion (\* = bootstrap support >90). **A)** A phylogeny of bHLH/PAS domain proteins shows that *S.mansoni* lacks BMAL1 and CLOCK homologs. Our BLASTP hits cluster with the closely-related non-circadian proteins ARNT, AHR and SIM. **B)** A phylogeny of orthologous genes *tim1* (TIMELESS) and *tim2* (TIMEOUT) shows that our BLASTP hit clusters with *tim2*. We also show that the previously identified *timeless* homolog in the flatworm *Schmidtea mediterranea* (Tsoum TSA et al., 2017) clusters with *tim2* homologs of model organisms. **C)** *S. mansoni* has two CPD photolyases but no circadian-related Cryptochromes. Abbreviations: Cg = *Crassostrea gigas*, Dr = *Danio rerio*, Dm = *Drosophila melanogaster*, Ep = *Eurydice pulchra*, Hs = *Homo sapiens*, Ml = *Melibe leonina*, Mm = *Mus musculus*, Pd = *Platynereis dumerilii*, Smed = *Schmidtea mediterranea*, Tc = *Tribolium castaneum*

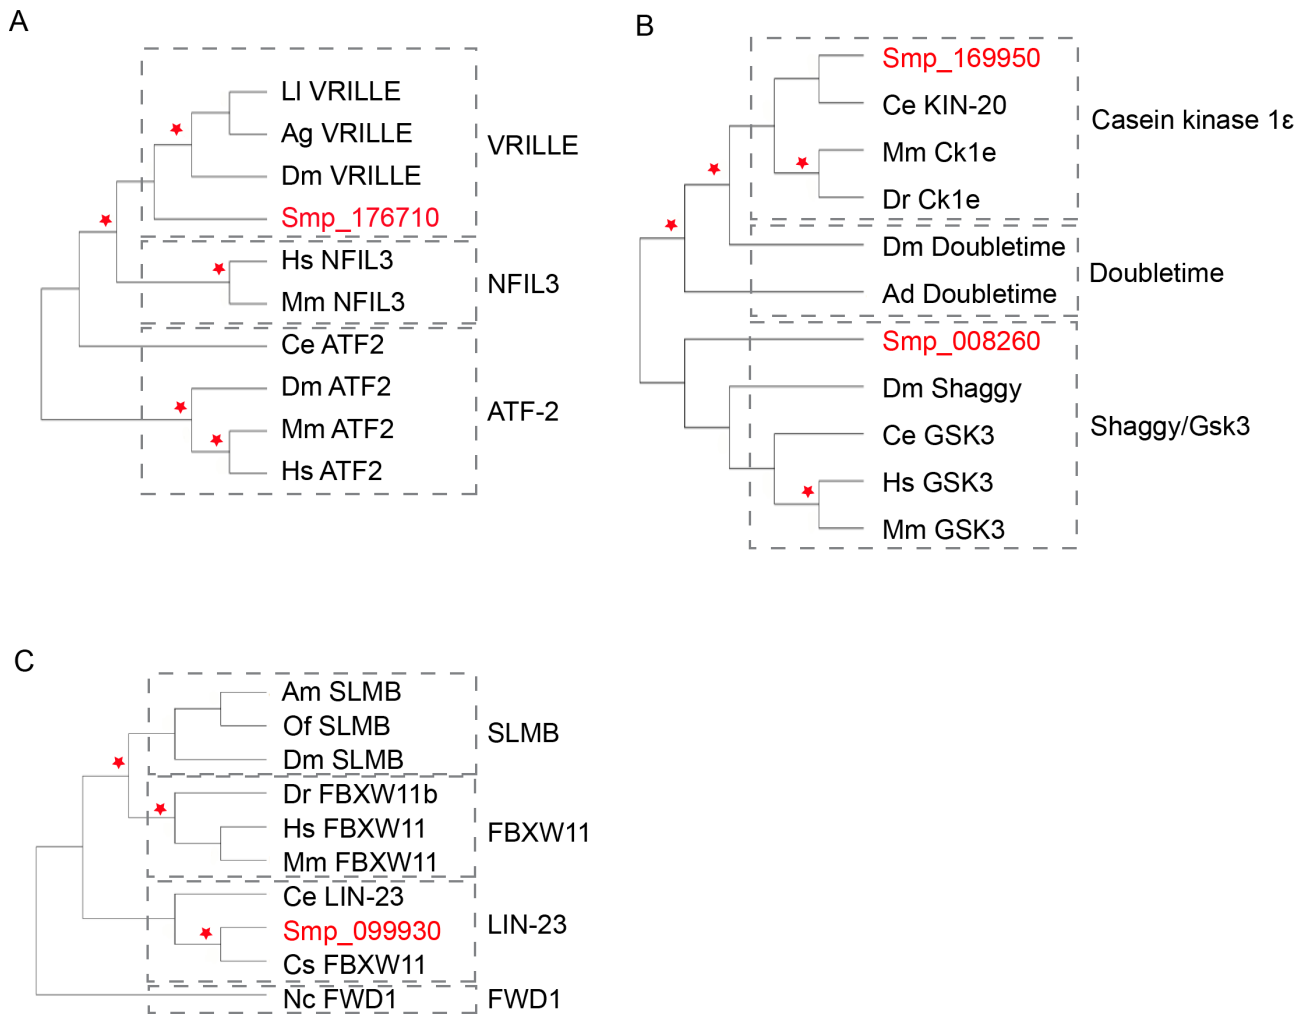

1396  
1397

**Supplementary figure 12. *Schistosoma mansoni* has homologs of secondary clock genes.**

Neighbour-joining phylogenetic trees were constructed in Mega-X with 1000 bootstrap replications and 80% partial deletion using sequences obtained from Uniprot. (\* = bootstrap support >90). **A)** Representatives of basic-leucine zipper protein family show insect *vrille* homolog is present in *S. mansoni*. **B)** Smp\_169950 clusters with mammalian homologs of *doubletime*, whereas Smp\_008260 clusters with *Shaggy*. **C)** Smp\_099930 clusters with Lin-23, a previously identified homolog of Slmb in *Caenorhabditis elegans*. Ancestral sequence from *Neurospora Crassa* was used as an out-group. Conserved regions were obtained in Gblocks using least stringency criteria and percentage of all sequences used was as follows: 3% basic-leucine zipper, 11% slmb, 18% shaggy/doubletime. Abbreviations: Ll = *Lutzomyia longipalpis*, Ag = *Anopheles gambiae*, Dm = *Drosophila melanogaster*, Hs = *Homo sapiens*, Mm = *Mus musculus*, Ce = *Caenorhabditis elegans*, Cg = *Crassostrea gigas*, Am = *Apis mellifera*, Of = *Oncopeltus fasciatus*, Dr = *Danio rerio*, Nc = *Neurospora crassa*, Cs = *Clonorchis sinensis*, Ad = *Anopheles darlingi*.

1398  
1399  
1400  
1401  
1402  
1403  
1404  
1405  
1406
